# Supplementary material for: Functionalised organometallic photoswitches containing dihydropyrene units
Source: Royal Society of Chemistry journal article supplement (doi:10.1039/d3dt02505e), 2023-01-01
Supplement: d3dt02505e1.pdf [file d3dt02505e1.pdf]

## Supporting Information

### **Functionalised organometallic photoswitches containing dihydropyrene units**

Angus A. Gillespie,<sup>a</sup> Max Roemer,<sup>b</sup> David Jago,<sup>a</sup> Alexandre N. Sobolev,<sup>c</sup> Gareth L. Nealon,<sup>c</sup> Peter R. Spackman,<sup>d</sup> Stephen Moggach,<sup>a</sup> and George A. Koutsantonis\*,<sup>a</sup>

<sup>a</sup>Chemistry, School of Molecular Science, The University of Western Australia, Crawley, WA 6009, Australia.

<sup>b</sup>School of Chemistry, The University of Sydney, Sydney, NSW 2006, Australia

<sup>c</sup>Centre for Microscopy, Characterisation and Analysis, The University of Western Australia, Crawley, WA 6009, Australia .

<sup>d</sup>Curtin Institute for Computation, School of Molecular and Life Sciences, Curtin University, GPO Box U1987, Perth, Western Australia 6845, Australia.

#### Table of Contents

|                                  |    |
|----------------------------------|----|
| Spectra.....                     | 2  |
| UV-Vis Data .....                | 22 |
| Crystallography .....            | 23 |
| Electrochemistry .....           | 27 |
| Irradiation Experiments.....     | 31 |
| Spectroelectrochemistry .....    | 32 |
| Acid Switching Studies .....     | 35 |
| Oxidation Switching Studies..... | 41 |
| Theoretical .....                | 45 |

## Spectra

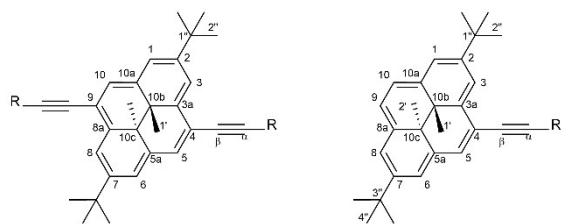

**Figure S1** General numbering scheme for DHP and DHP complexes

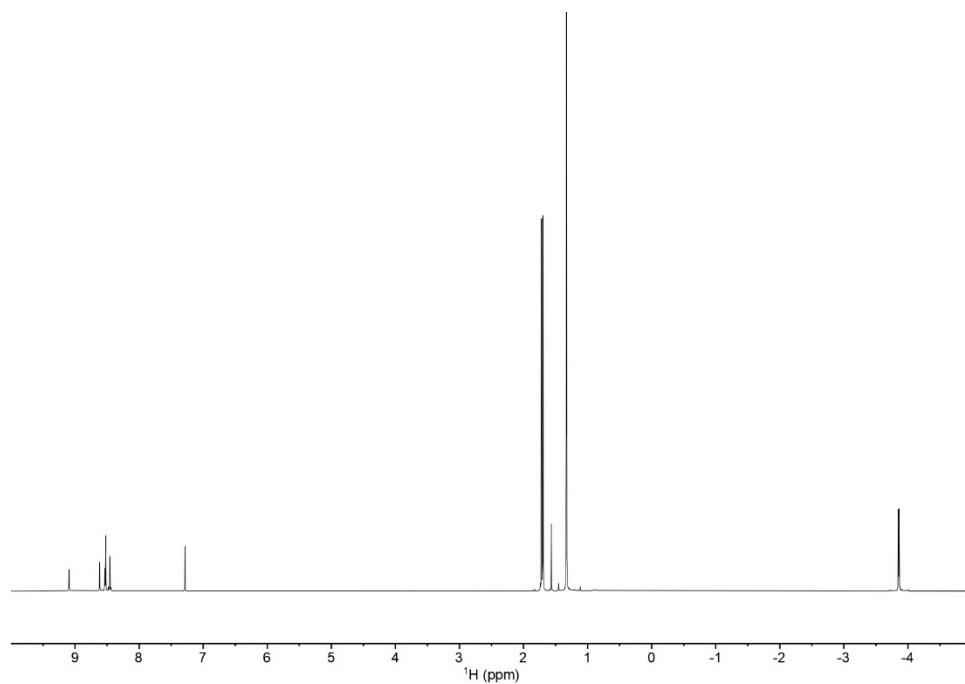

**Figure S2**  $^1\text{H}$  NMR spectrum of **3b** (500 MHz,  $\text{CDCl}_3$ )

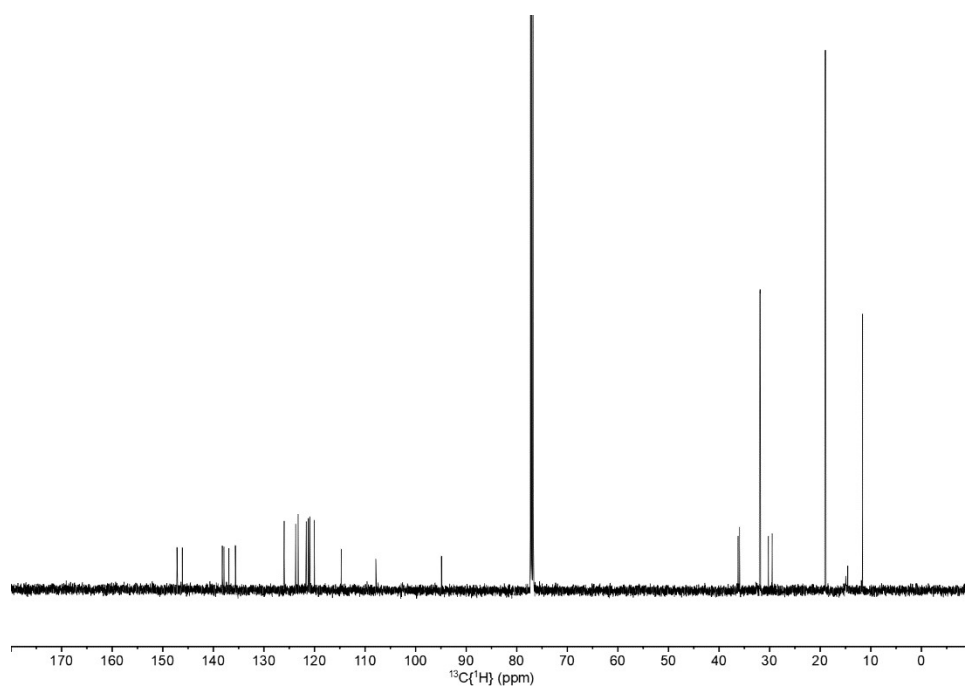

**Figure S3**  $^{13}\text{C}\{^1\text{H}\}$  NMR spectrum of **3b** (126 MHz,  $\text{CDCl}_3$ )

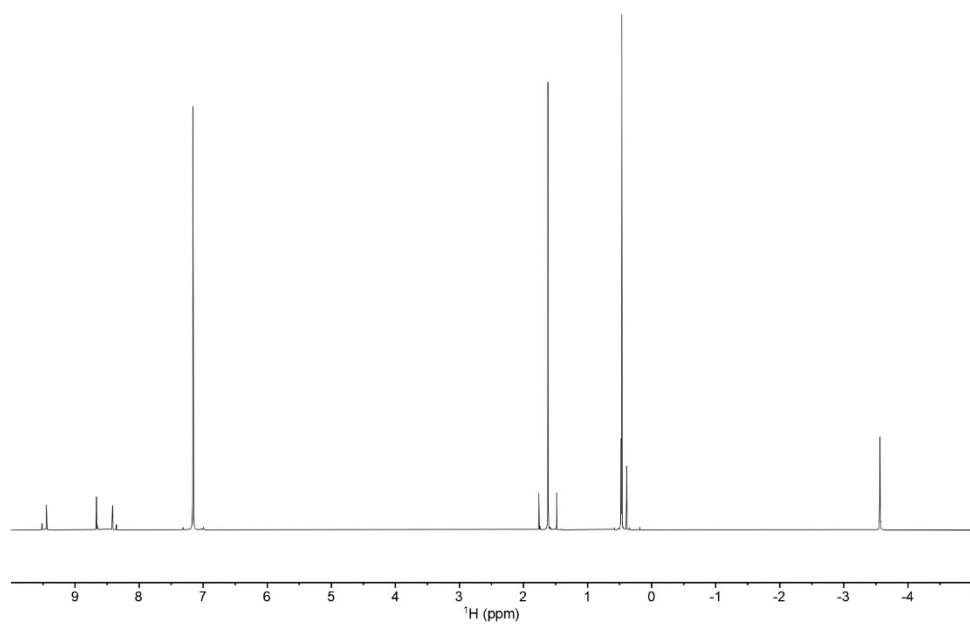

**Figure S4**  $^1\text{H}$  NMR spectrum of **3c** (500 MHz,  $\text{C}_6\text{D}_6$ )

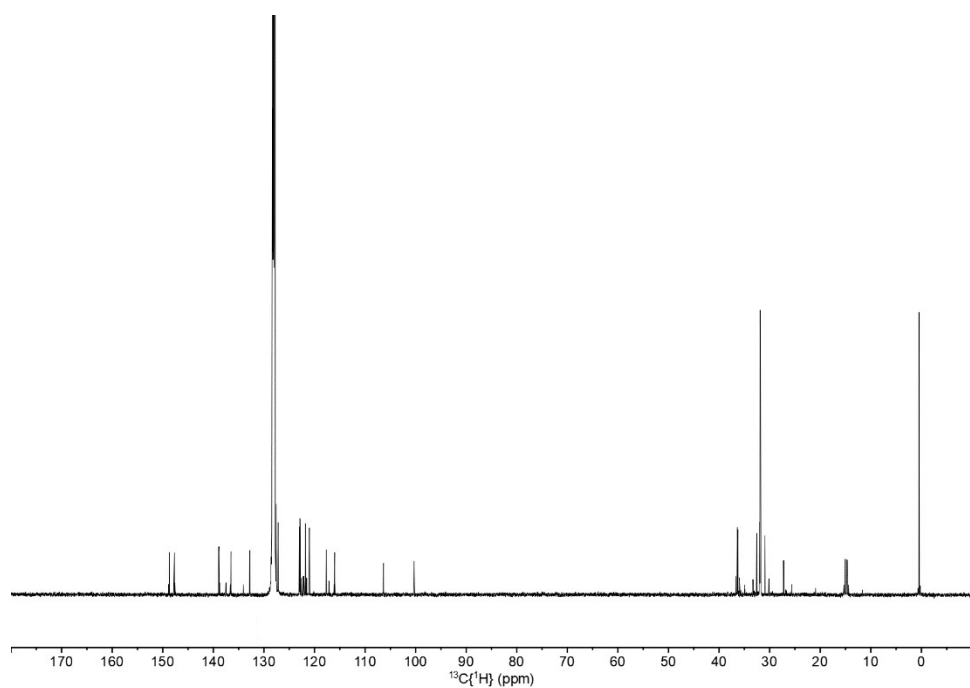

**Figure S5**  $^{13}\text{C}\{^1\text{H}\}$  NMR spectrum of **3c** (126 MHz,  $\text{C}_6\text{D}_6$ )

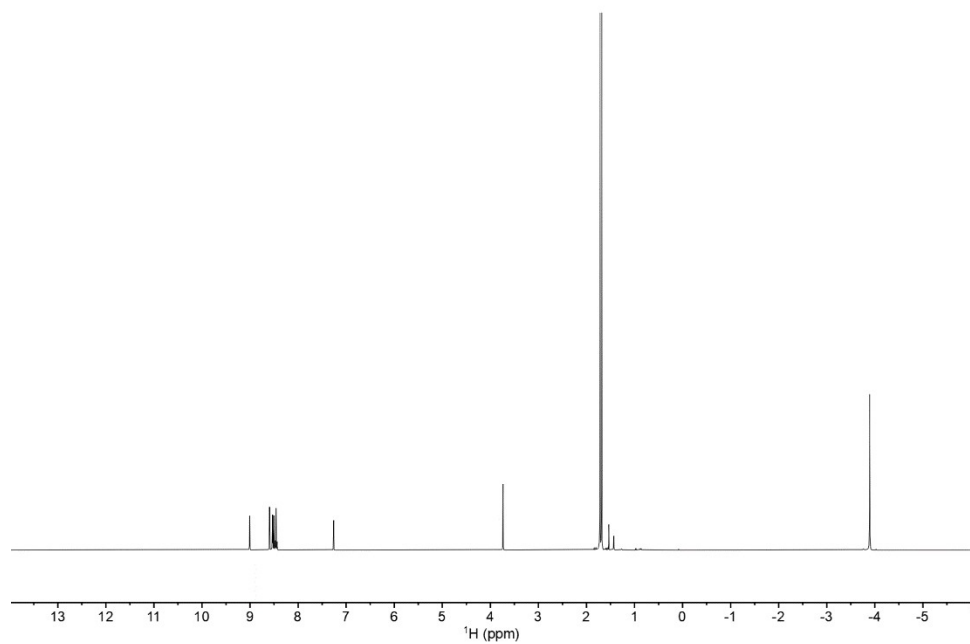

**Figure S6**  $^1\text{H}$  NMR spectrum of **4** (500 MHz,  $\text{CDCl}_3$ )

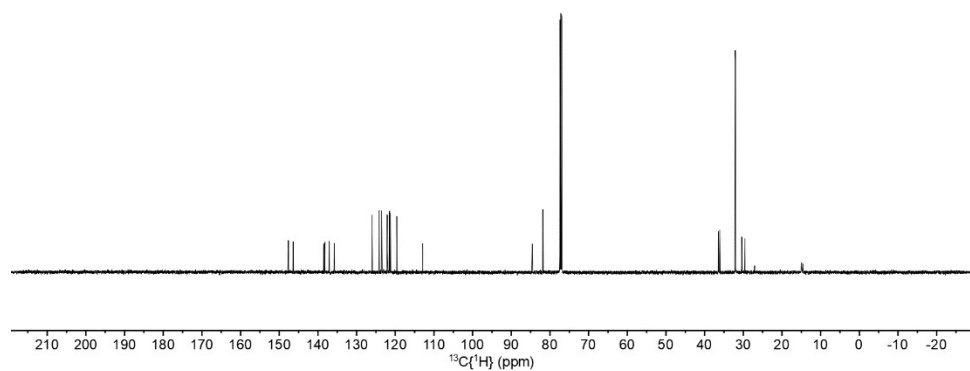

**Figure S7**  $^{13}\text{C}\{^1\text{H}\}$  NMR spectrum of **4** (126 MHz,  $\text{CDCl}_3$ )

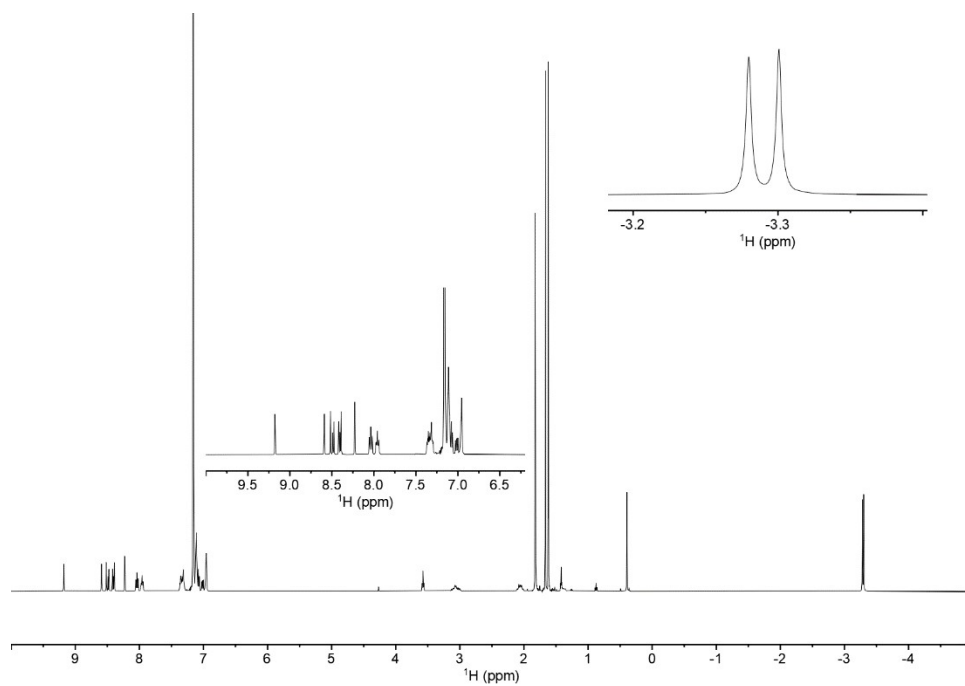

**Figure S8**  $^1\text{H}$  NMR spectrum of **Ru1** (500 MHz,  $\text{C}_6\text{D}_6$ )

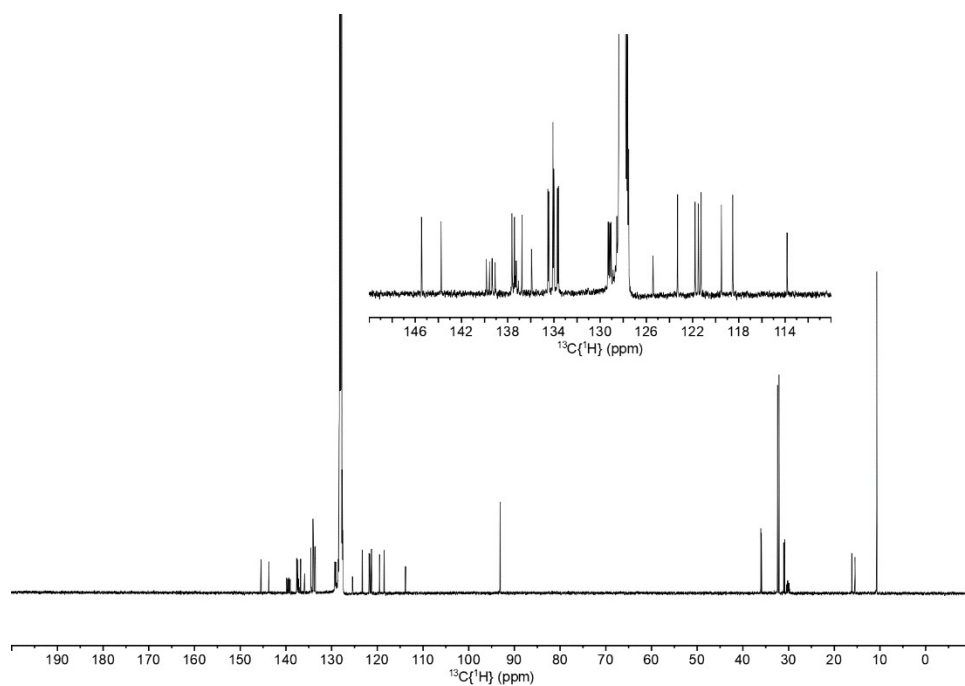

**Figure S9**  $^{13}\text{C}\{^1\text{H}\}$  NMR spectrum of **Ru1** (500 MHz,  $\text{C}_6\text{D}_6$ )

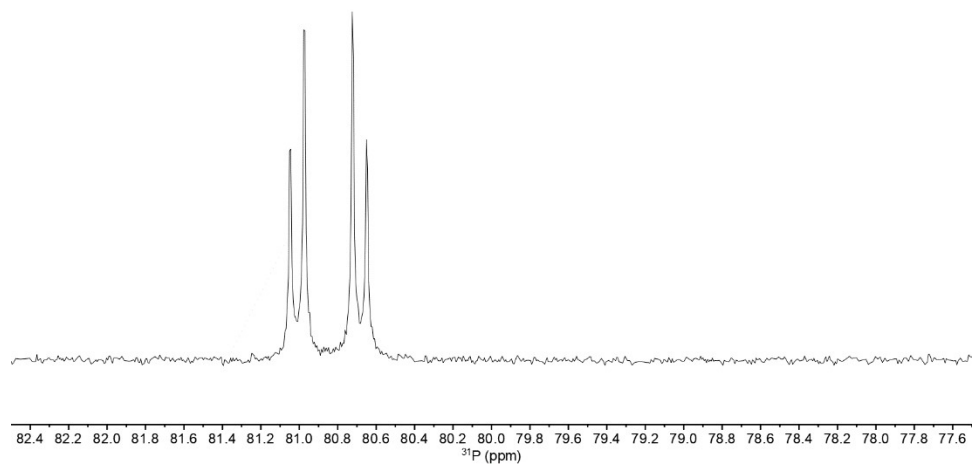

**Figure S10**  $^{31}\text{P}\{^1\text{H}\}$  NMR spectrum of **Ru1** (202 MHz,  $\text{C}_6\text{D}_6$ )

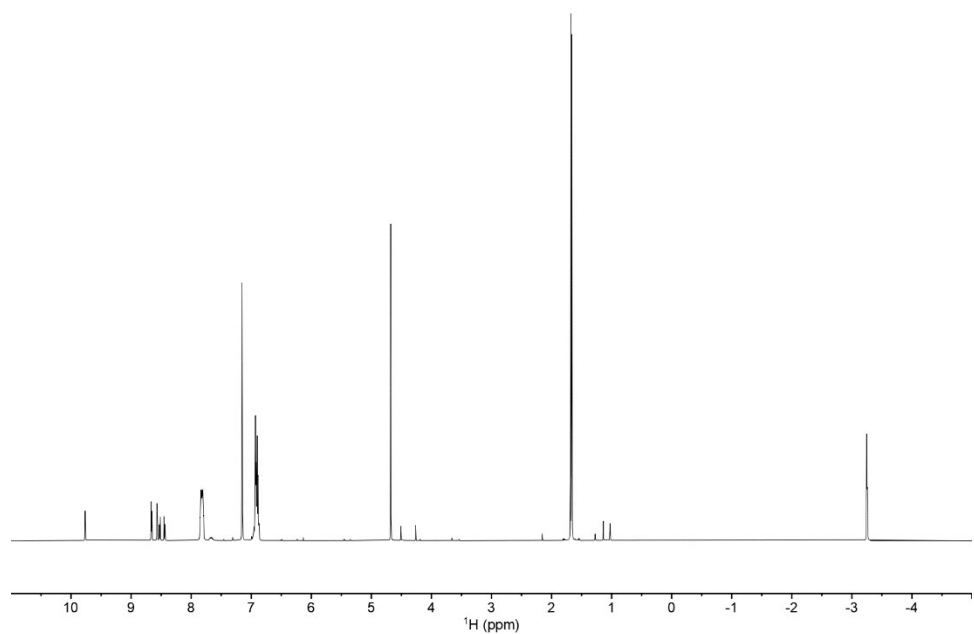

**Figure S11**  $^1\text{H}$  NMR spectrum of **Ru2** (500 MHz,  $\text{C}_6\text{D}_6$ )

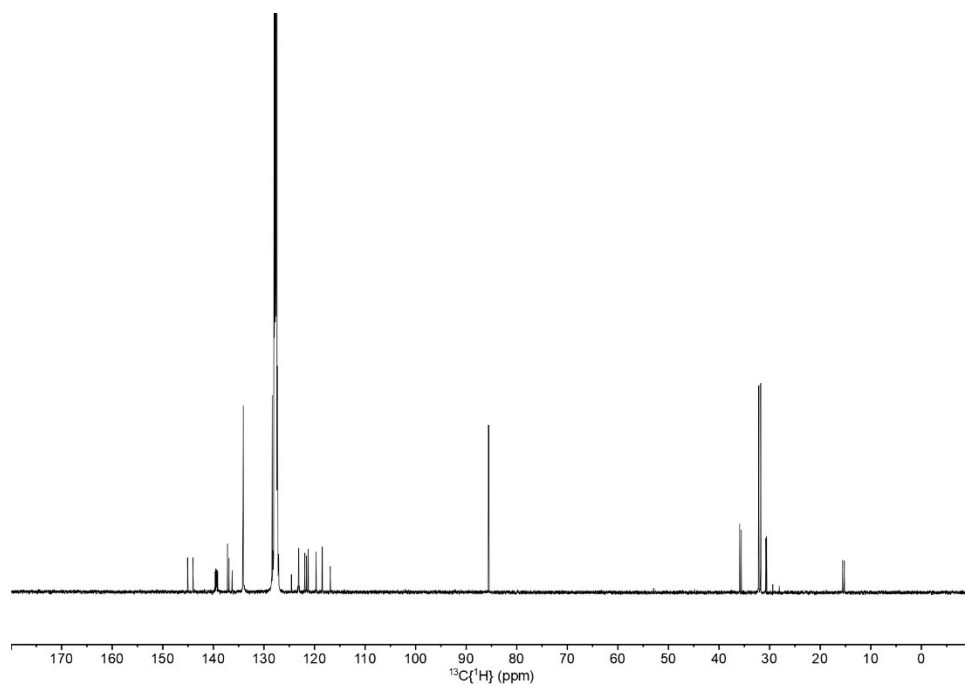

**Figure S12**  $^{13}\text{C}\{^1\text{H}\}$  NMR spectrum of **Ru2** (126 MHz,  $\text{C}_6\text{D}_6$ )

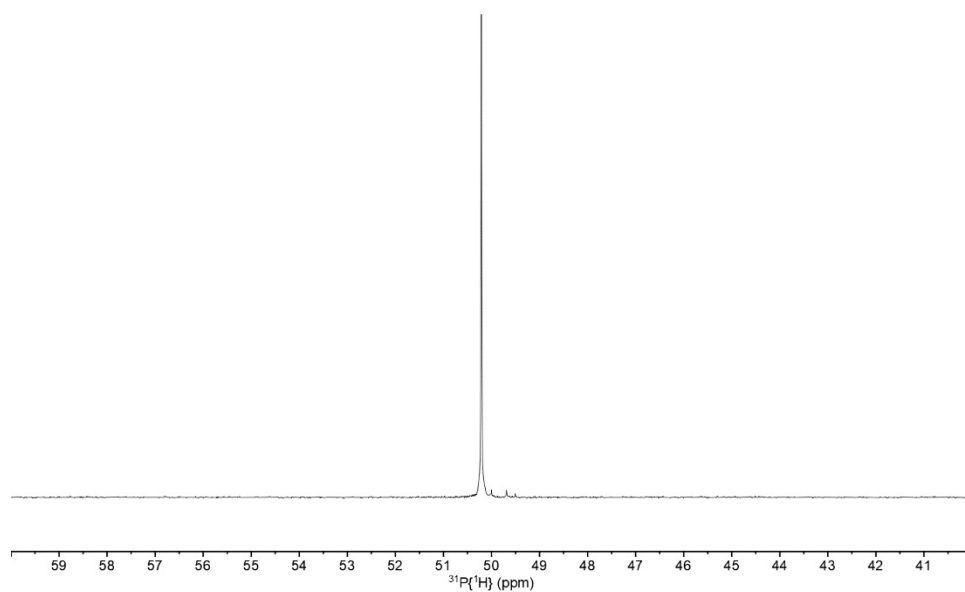

**Figure S13**  $^{31}\text{P}\{^1\text{H}\}$  NMR spectrum of **Ru2** (202 MHz,  $\text{C}_6\text{D}_6$ )

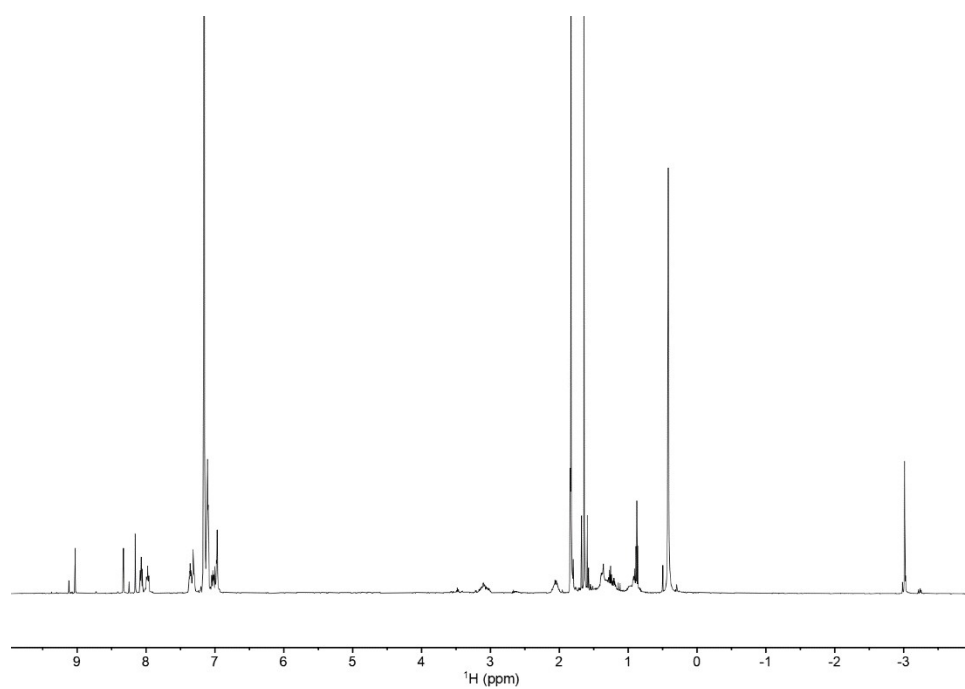

**Figure S14** <sup>1</sup>H NMR spectrum full of **Ru4** (500 MHz, C<sub>6</sub>D<sub>6</sub>)

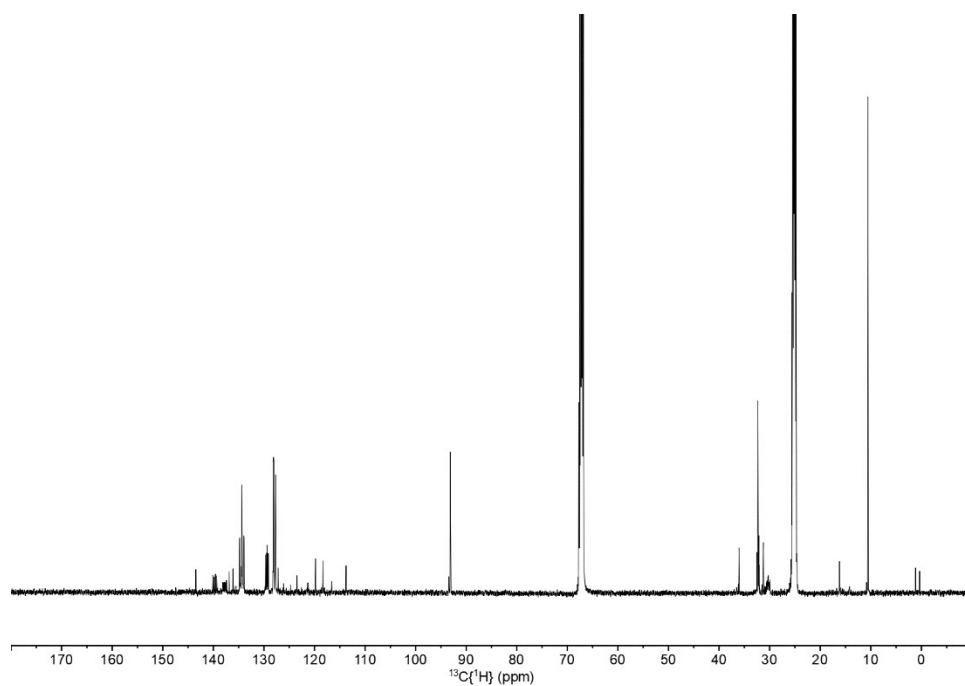

**Figure S15** <sup>13</sup>C{<sup>1</sup>H} NMR Full Spectrum of **Ru4** (126 MHz, THF-d<sub>8</sub>)



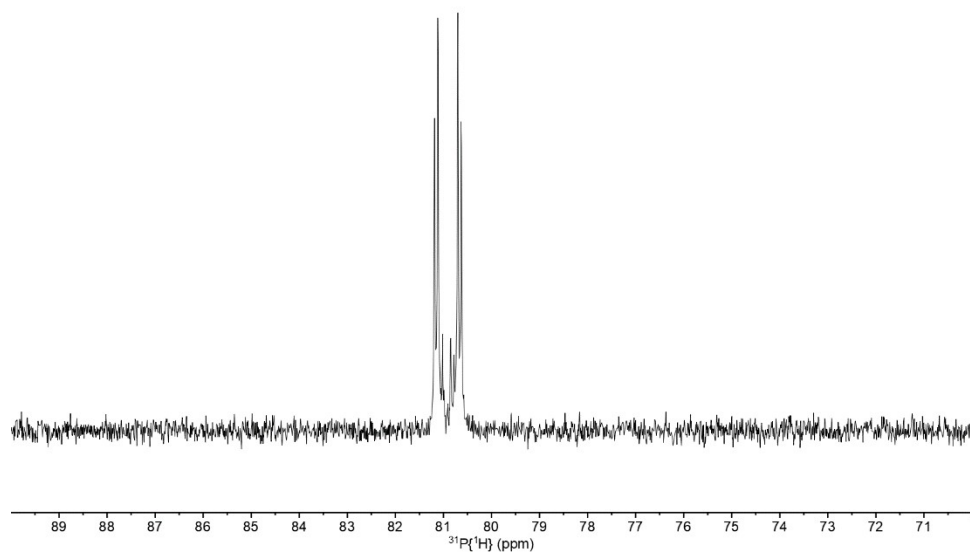

**Figure S16**  $^{31}\text{P}\{^1\text{H}\}$  NMR spectrum of **Ru4** (202 MHz,  $\text{C}_6\text{D}_6$ )

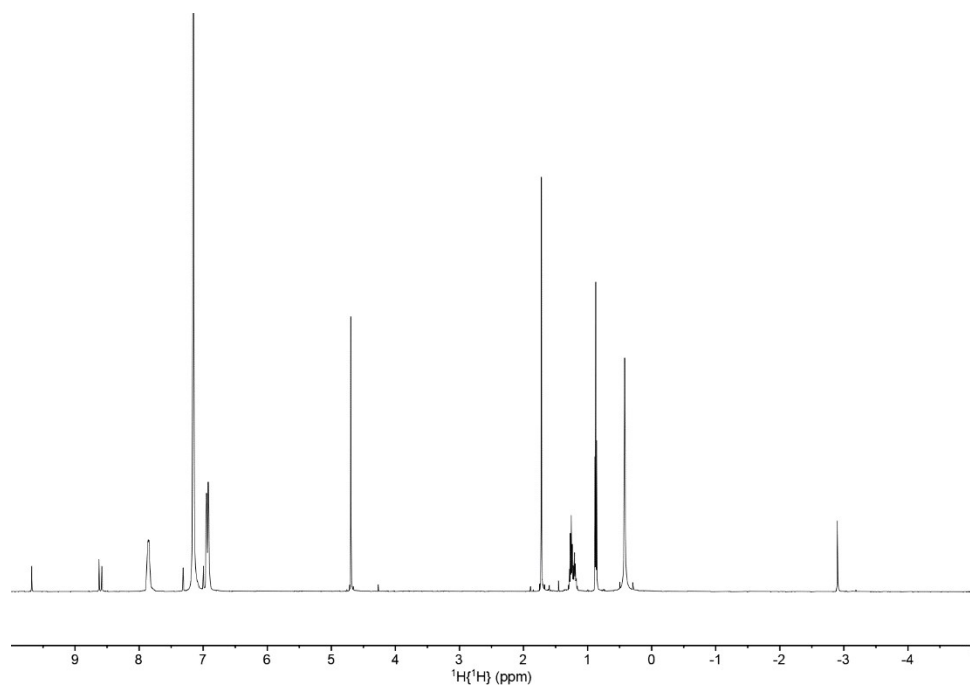

**Figure S17**  $^1\text{H}$  NMR full spectrum of **Ru5** (500 MHz,  $\text{C}_6\text{D}_6$ )

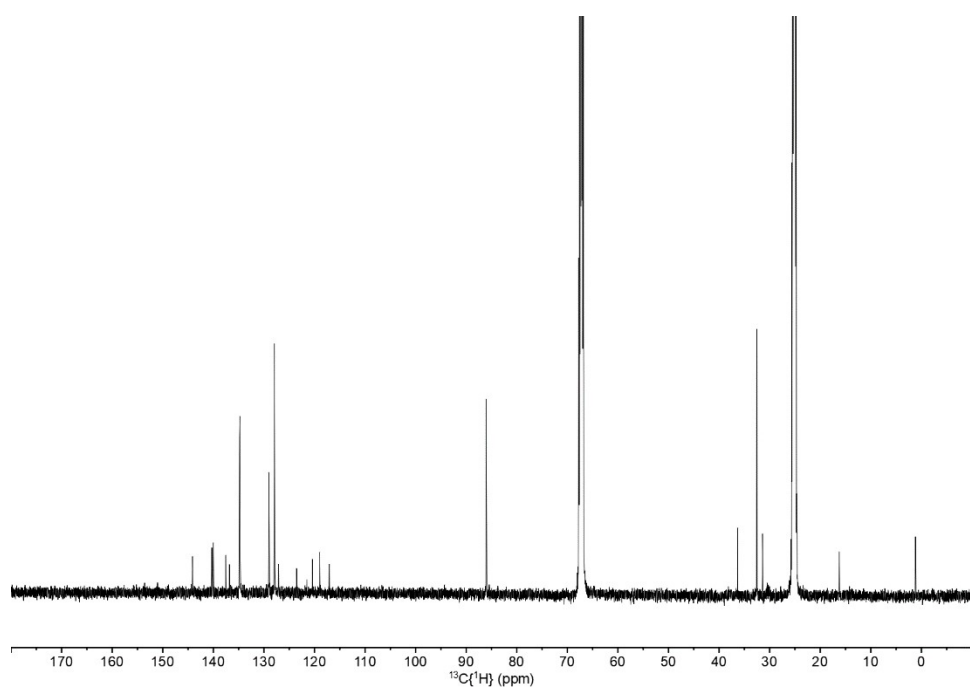

**Figure S18**  $^{13}\text{C}\{^1\text{H}\}$  NMR full spectrum of **Ru5** (126 MHz, THF-d8)

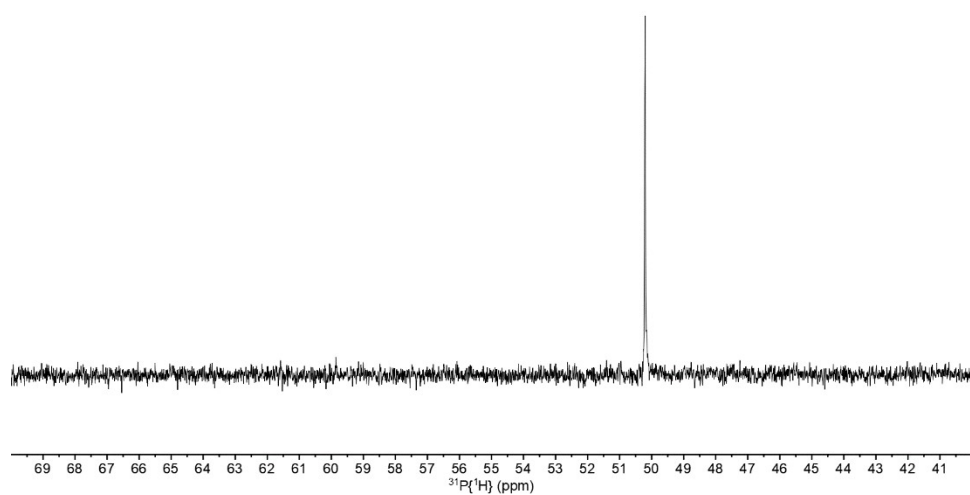

**Figure S19**  $^{31}\text{P}\{^1\text{H}\}$  NMR spectrum **Ru5** (202 MHz,  $\text{C}_6\text{D}_6$ )

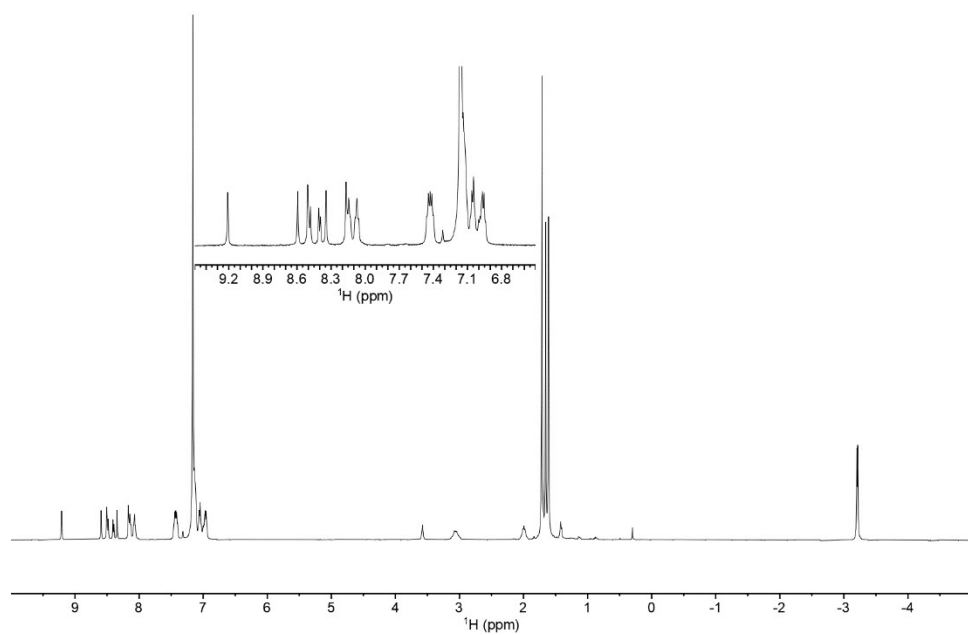

**Figure S20**  $^1\text{H}$  NMR full spectrum **Fe1** (500 MHz,  $\text{C}_6\text{D}_6$ )

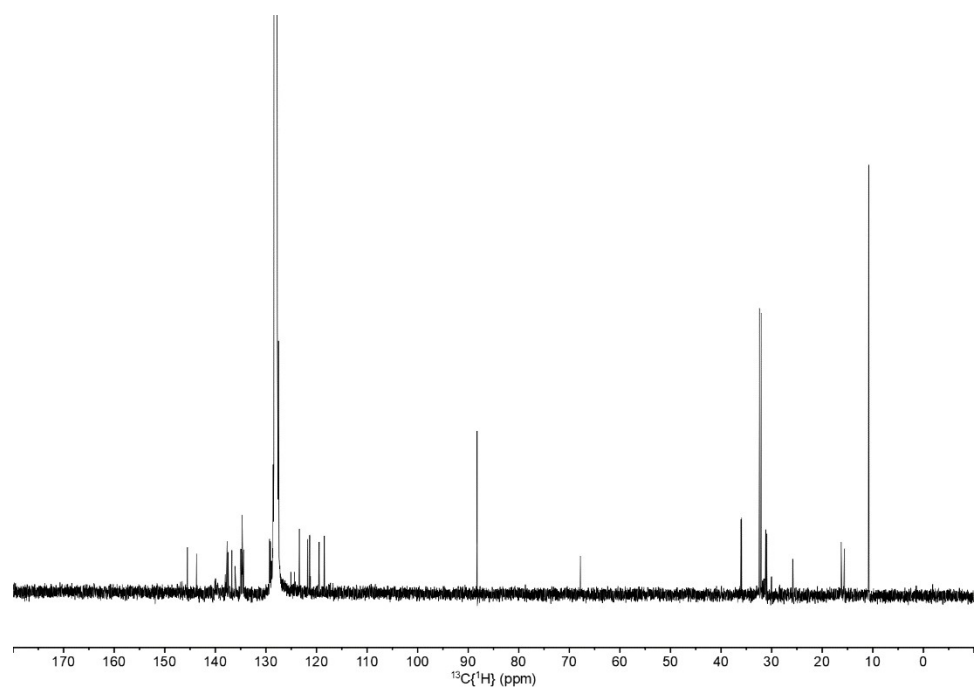

**Figure S21**  $^{13}\text{C}\{^1\text{H}\}$  NMR full spectrum **Fe1** (126 MHz,  $\text{C}_6\text{D}_6$ )

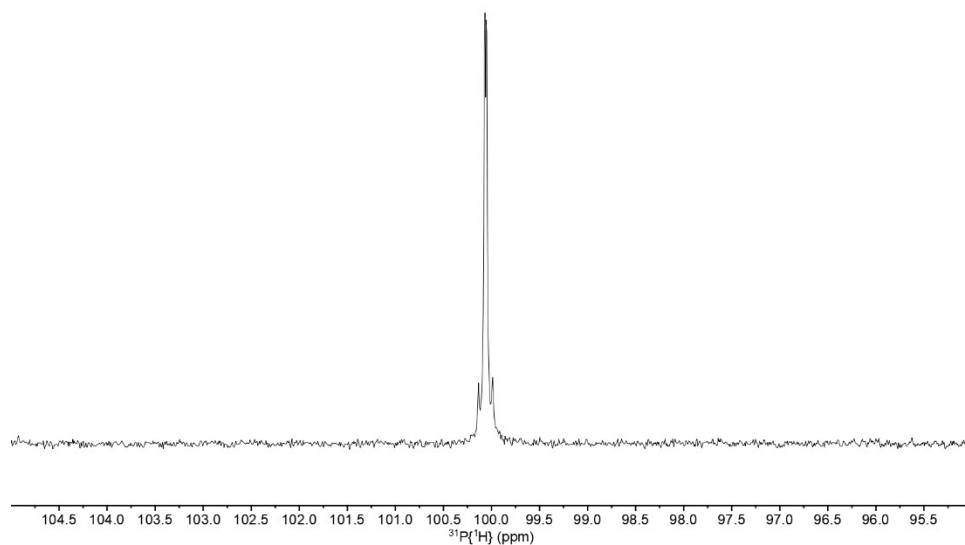

**Figure S22**  $^{31}\text{P}\{^1\text{H}\}$  NMR Spectrum Fe1 (202 MHz,  $\text{C}_6\text{D}_6$ )

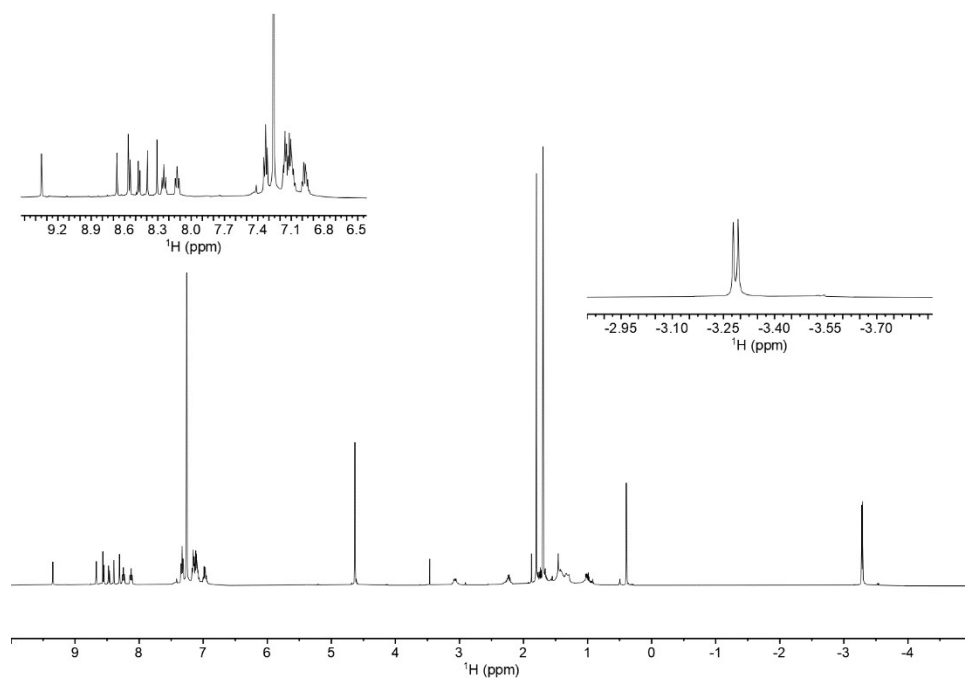

**Figure S23**  $^1\text{H}$  NMR Spectrum Fe2 (500 MHz,  $\text{C}_6\text{D}_6$ )

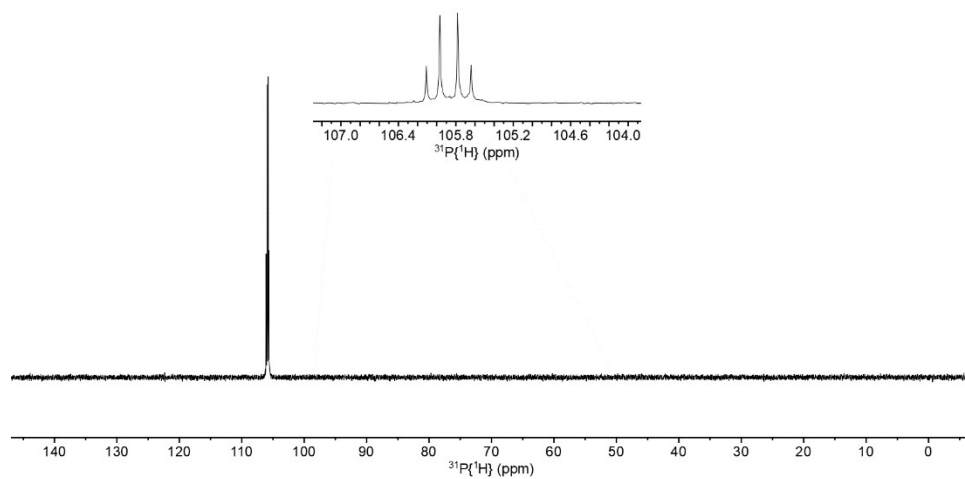

**Figure S24**  $^{31}\text{P}\{^1\text{H}\}$  NMR Spectrum **Fe2** (202 MHz,  $\text{C}_6\text{D}_6$ )

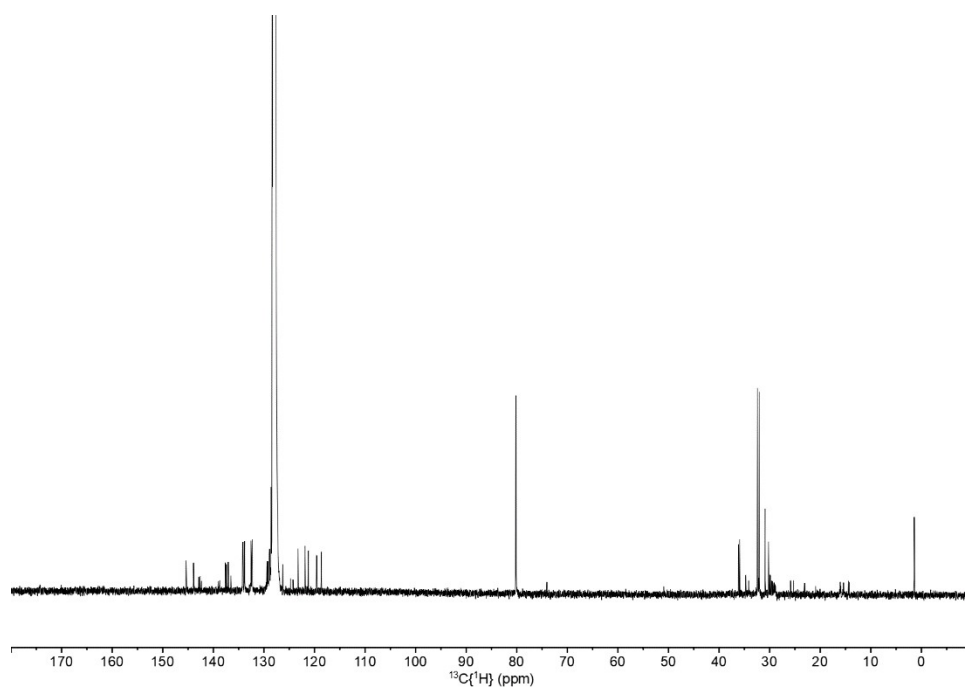

**Figure S25**  $^{13}\text{C}\{^1\text{H}\}$  NMR Spectrum **Fe2** (126 MHz,  $\text{C}_6\text{D}_6$ )

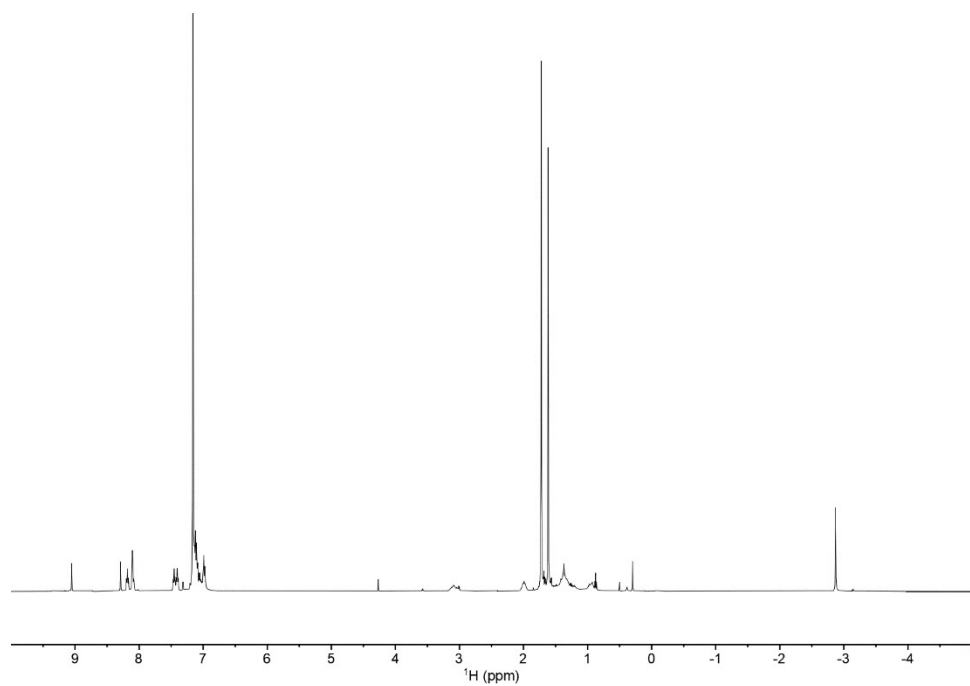

**Figure S26**  $^1\text{H}$  NMR full spectrum **Fe3** (500 MHz,  $\text{C}_6\text{D}_6$ )

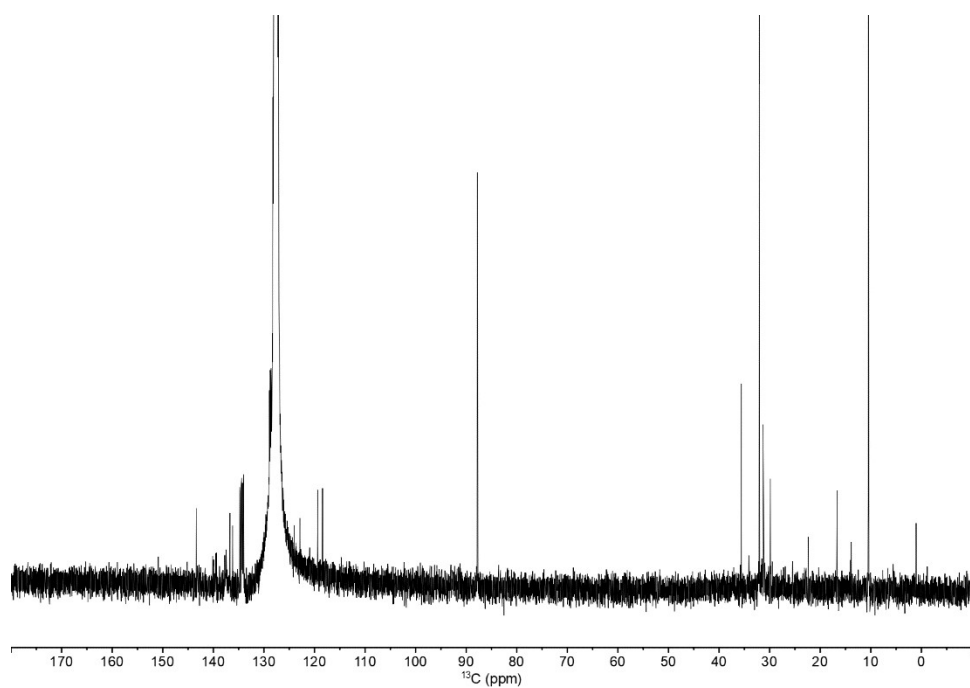

**Figure S27**  $^{13}\text{C}\{^1\text{H}\}$  NMR full spectrum **Fe3** (126 MHz,  $\text{C}_6\text{D}_6$ )

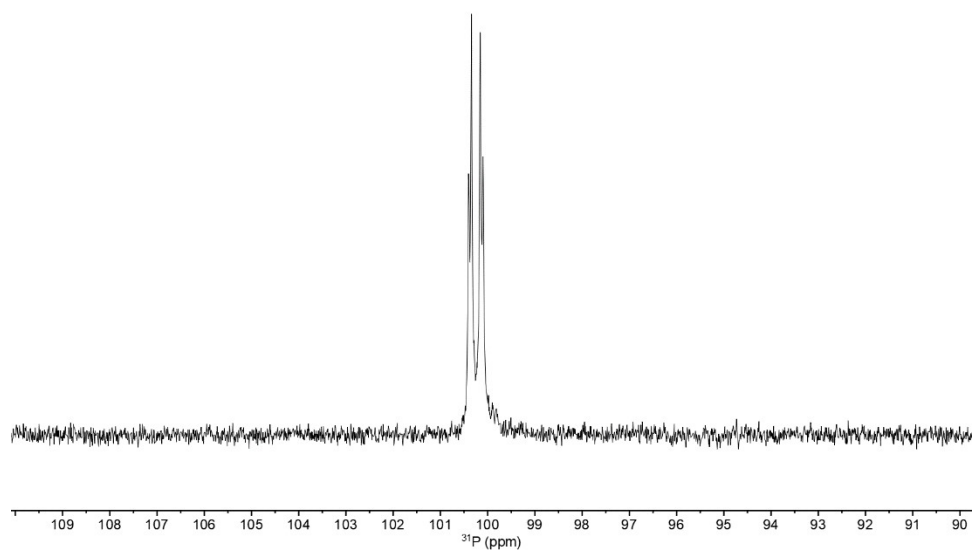

**Figure S28**  $^{31}\text{P}\{^1\text{H}\}$  NMR spectrum **Fe3** (202 MHz,  $\text{C}_6\text{D}_6$ )

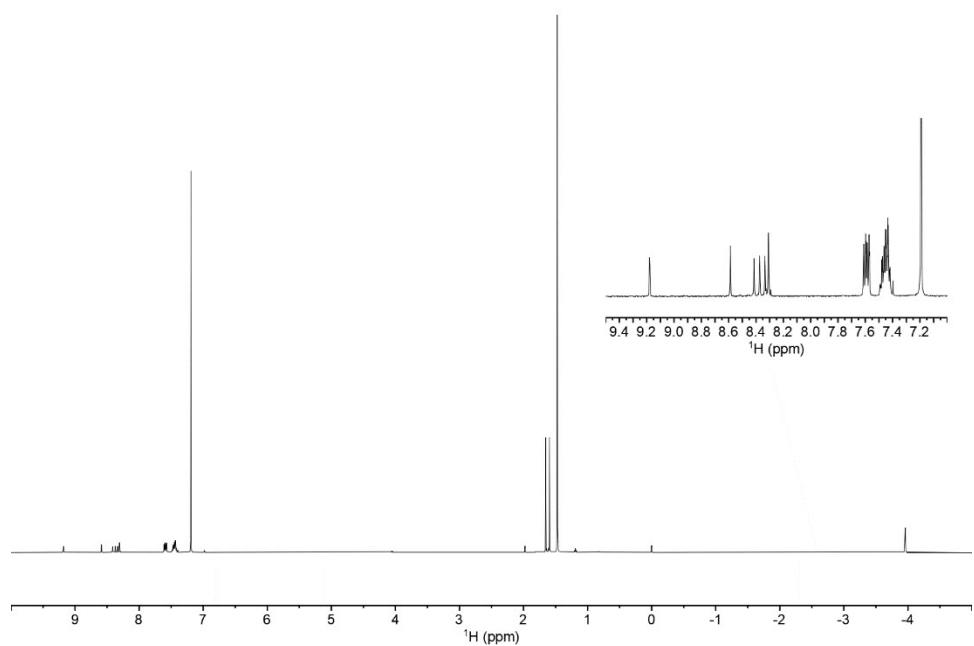

**Figure S29**  $^1\text{H}$  NMR spectrum **Au1** (500 MHz,  $\text{CDCl}_3$ )

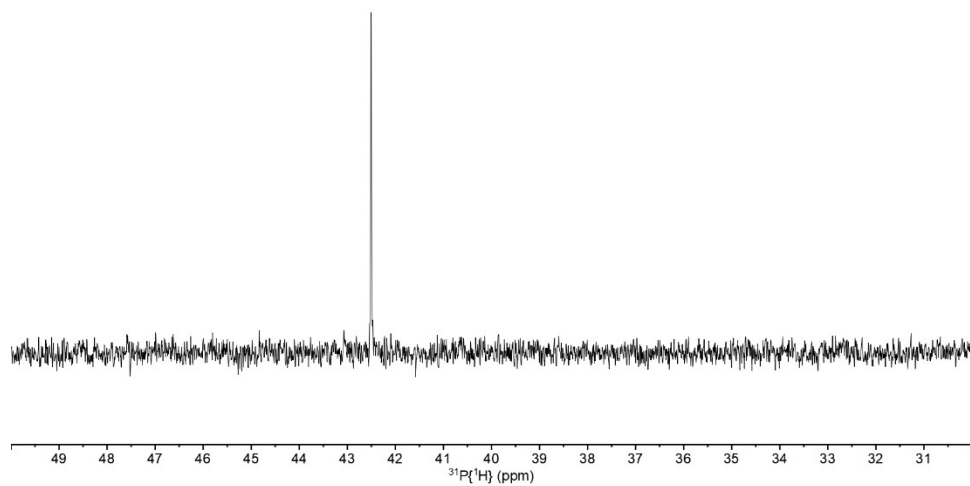

**Figure S30**  $^{31}\text{P}\{^1\text{H}\}$  NMR spectrum **Au1** (202 MHz,  $\text{CDCl}_3$ )

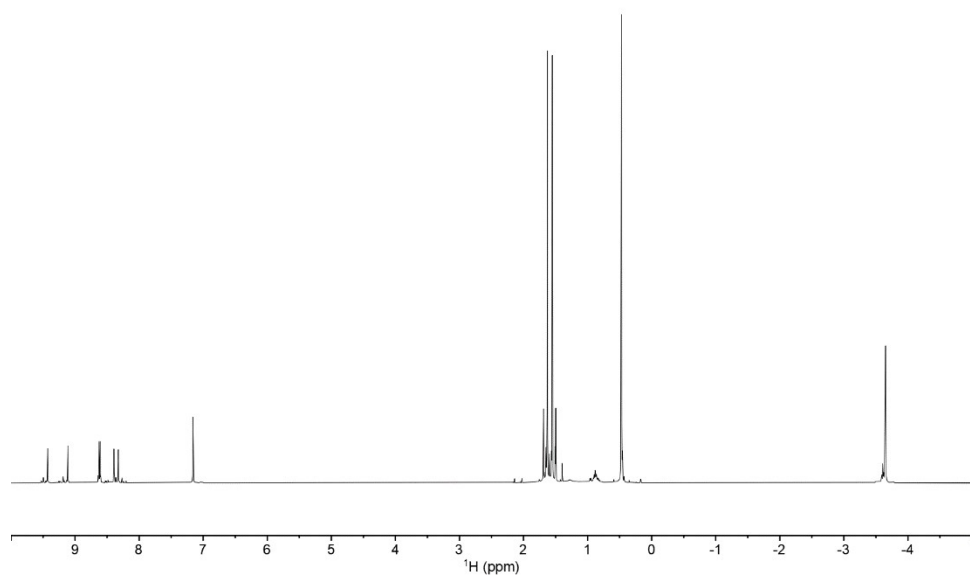

**Figure S31**  $^1\text{H}$  NMR spectrum **6** (500 MHz,  $\text{C}_6\text{D}_6$ )



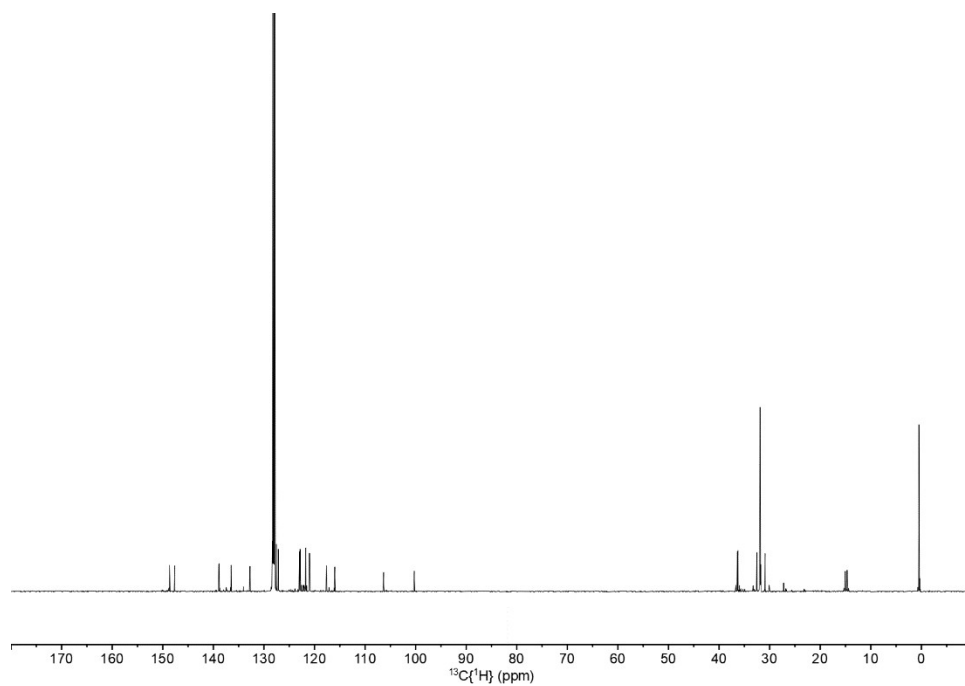

**Figure S32**  $^{13}\text{C}\{^1\text{H}\}$  NMR spectrum **6** (126 MHz,  $\text{C}_6\text{D}_6$ )

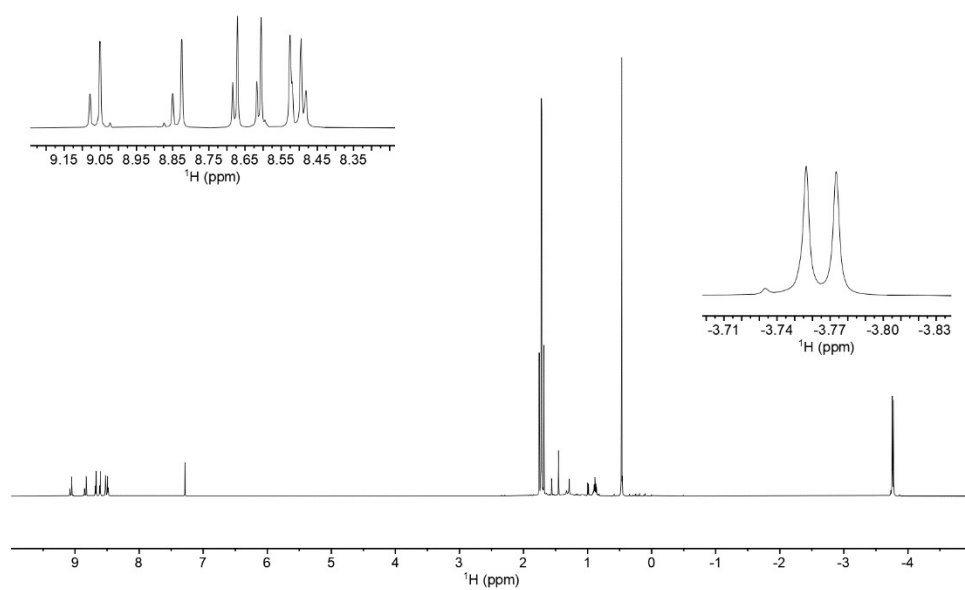

**Figure S33**  $^1\text{H}$  NMR spectrum **7** (500 MHz,  $\text{CDCl}_3$ )

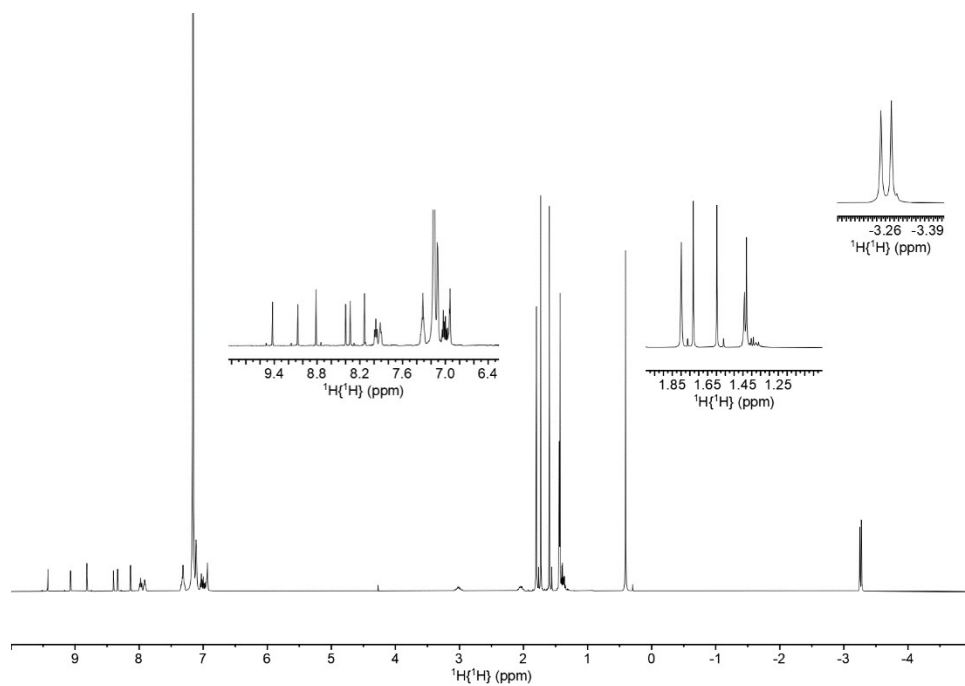

**Figure S34**  $^1\text{H}$  NMR spectrum **Ru6** (500 MHz,  $\text{C}_6\text{D}_6$ )

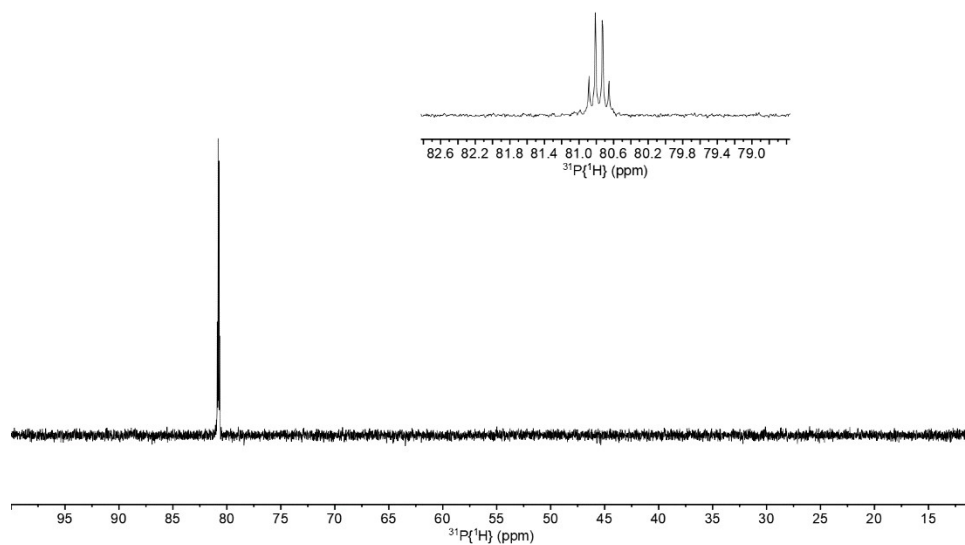

**Figure S35**  $^{31}\text{P}\{^1\text{H}\}$  NMR spectrum **Ru6** (202 MHz,  $\text{C}_6\text{D}_6$ )

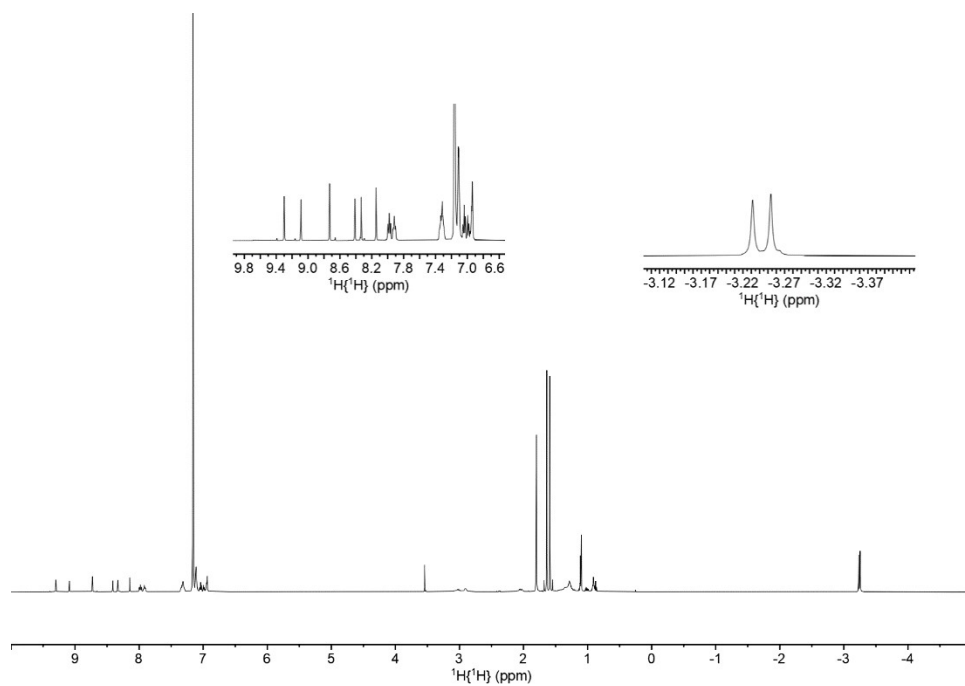

**Figure S36**  $^1\text{H}$  NMR spectrum **Ru7** (500 MHz,  $\text{C}_6\text{D}_6$ )

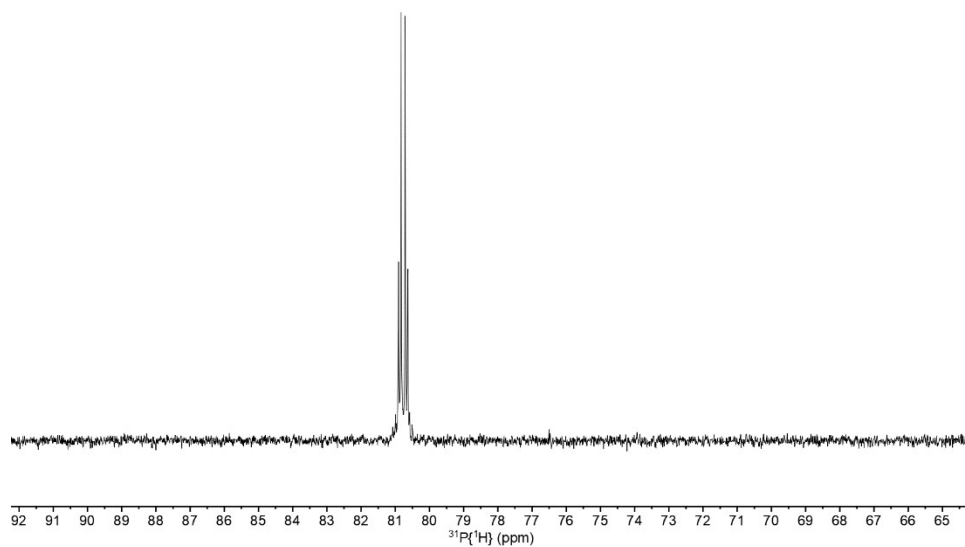

**Figure S37**  $^{31}\text{P}\{^1\text{H}\}$  NMR spectrum **Ru7** (202 MHz,  $\text{C}_6\text{D}_6$ )

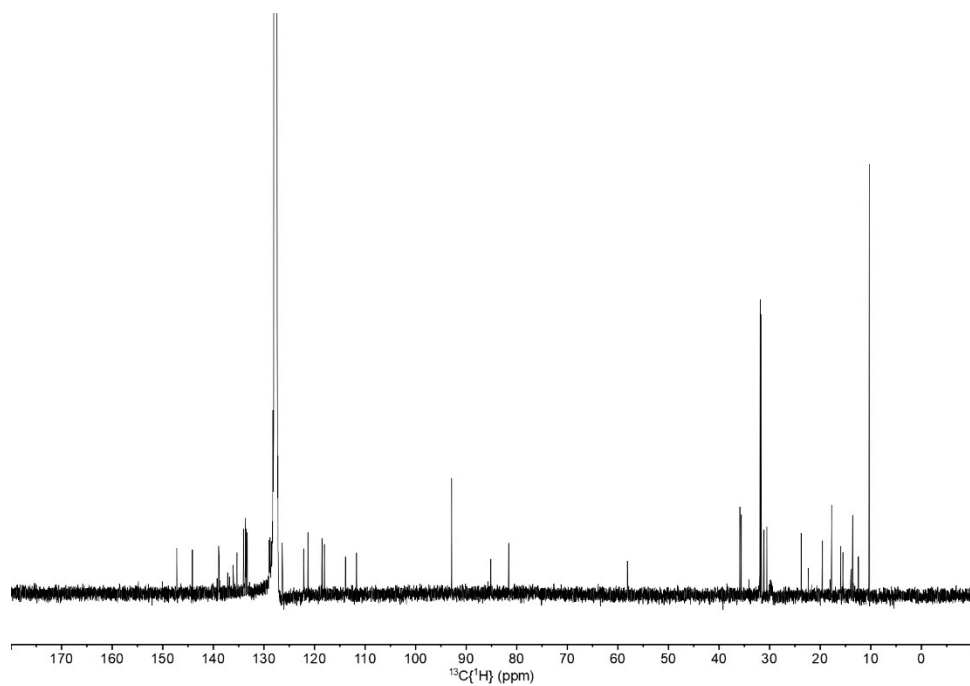

**Figure S38**  $^{13}\text{C}\{^1\text{H}\}$  NMR spectrum **Ru7** (202 MHz,  $\text{C}_6\text{D}_6$ )

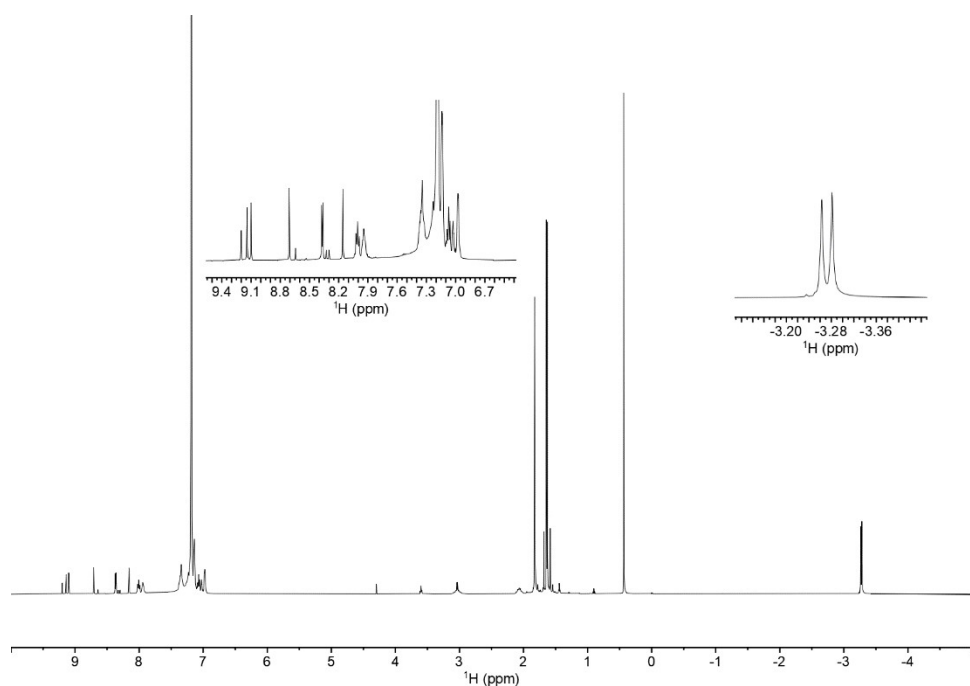

**Figure S39**  $^1\text{H}$  NMR spectrum **Ru8** (500 MHz,  $\text{C}_6\text{D}_6$ )

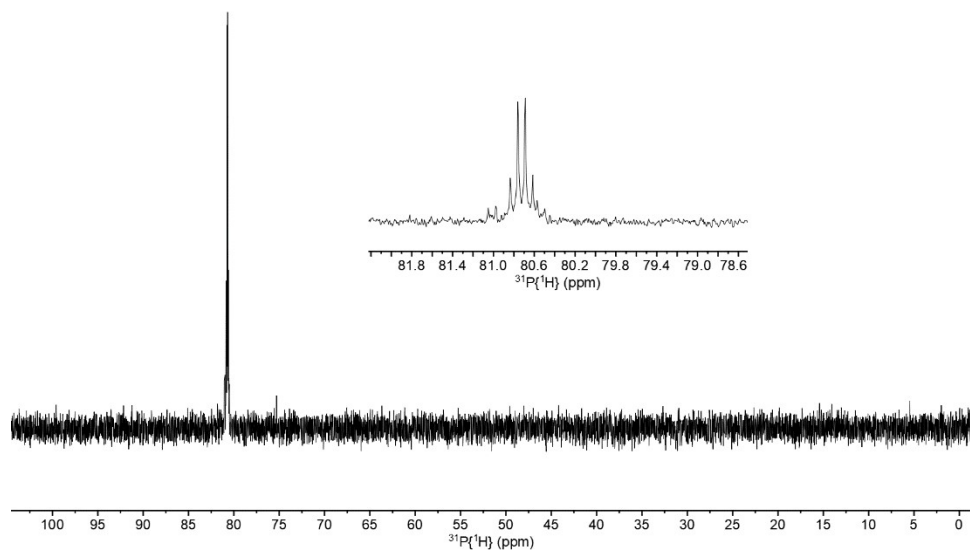

**Figure S40**  $^{31}\text{P}\{^1\text{H}\}$  NMR spectrum **Ru8** ( $\text{C}_6\text{D}_6$ )

## UV-Vis Data

**Table S1:** Summary of UV-vis Absorption Data<sup>a</sup>

| Complex    | Wavelength (nm), (Molar Attenuation Coefficient (L* $\text{mol}^{-1}$ * $\text{cm}^{-1}$ ))                        |
|------------|--------------------------------------------------------------------------------------------------------------------|
| <b>Ru1</b> | 230 (49465), 257 (sh, 26732), 345 (37037), 435 (27869), 541 (13302), 685 (6868)                                    |
| <b>Ru2</b> | 231 (38159), 340 (21573), 425 (21700), 526 (6868), 677 (1478)                                                      |
| <b>Ru4</b> | 230 (78025), 260 (sh, 40937), 335 (24774), 415 (sh, 25110), 440 (37714), 544 (sh, 14768), 586 (23114), 715 (12483) |
| <b>Ru5</b> | 230 (77513), 323 (18557), 410 (sh, 22020), 435 (33124), 568 (15603), 705 (6893)                                    |
| <b>Fe1</b> | 231 (43619), 273 (sh, 17924), 350 (40584), 389 (21473), 458 (13707), 586 (11279), 642 (5598), 696 (3280)           |

<sup>a</sup>Samples were prepared in a glovebox and kept under inert conditions. The spectra were recorded in DCM with a quartz cell 1 cm path length. Concentrations were kept low so as not to exceed absorption > 1.

## Crystallography

A suitable crystal was selected and mounted on a XtaLAB Synergy, single source diffractometer equipped with a HyPix detector, Oxford Diffraction Gemini-R Ultra, or Oxford Diffraction Xcalibur, Sapphire3. The crystal was kept at a steady temperature ( $T = 100$  K) during data collection. Structure was solved with ShelXT 2018/2<sup>1</sup> structure solution program using dual methods and Olex2<sup>2</sup> as the graphical interface. Model refined using X1 (version 2018/3)<sup>3</sup> using least squared minimisation on  $F^2$ .

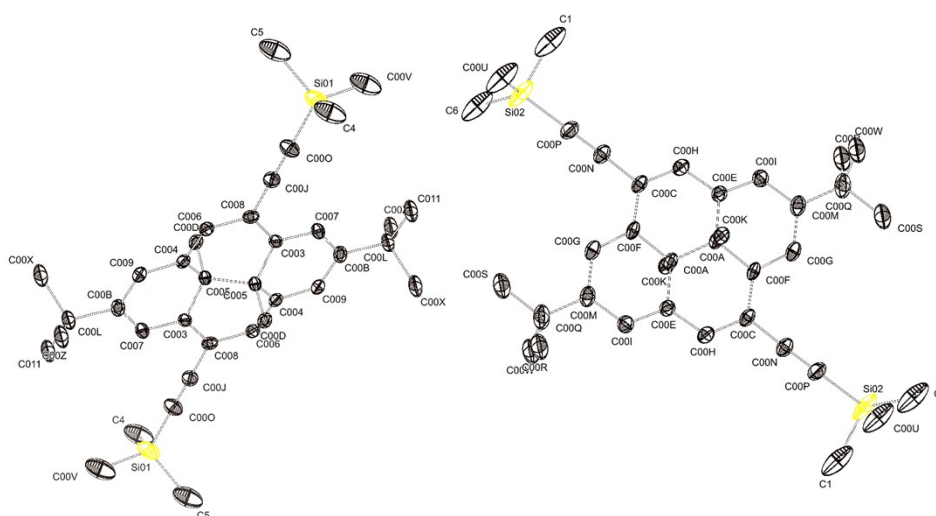

**Figure S41** ORTEP representation of **3c**. Hydrogens removed for clarity. Atomic displacement ellipsoids drawn at 30 % probability. Disorder removed for clarity.

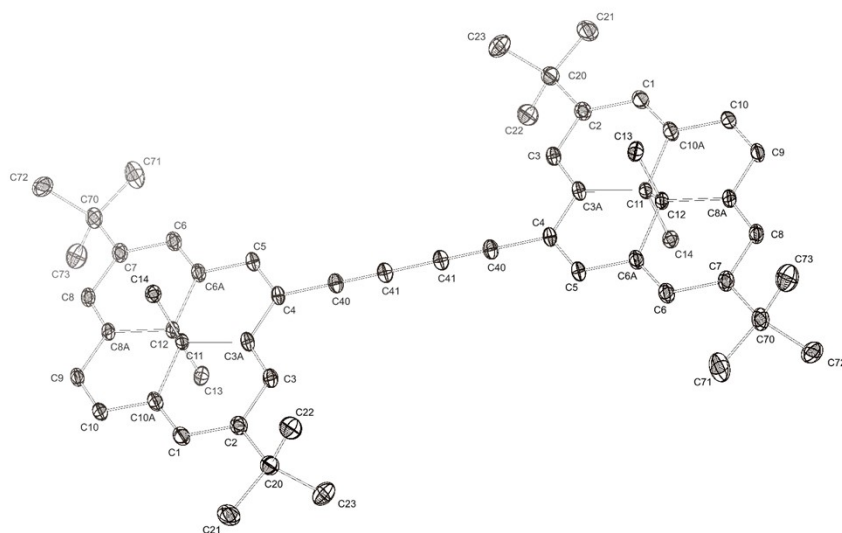

**Figure S42** ORTEP representation of **5**. Hydrogens removed for clarity. Atomic displacement ellipsoids drawn at 30 % probability. Disorder removed for clarity.

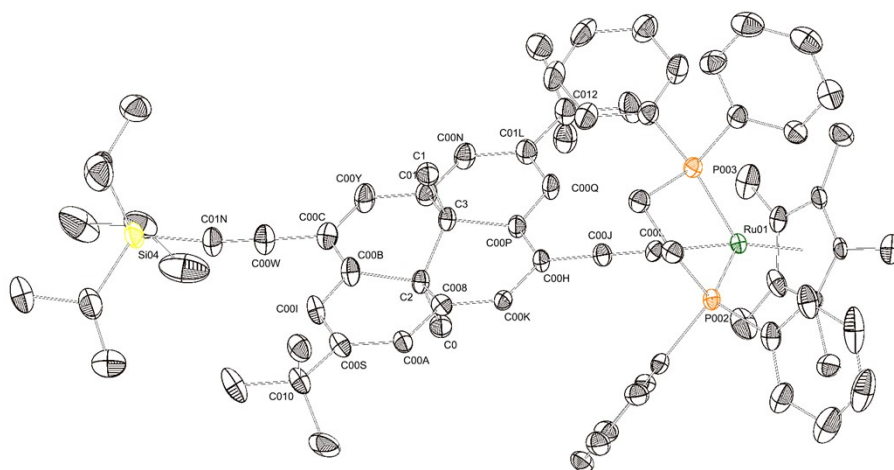

**Figure S43** ORTEP representation of **Ru6**. Hydrogens removed for clarity. Atomic displacement ellipsoids drawn at 30 % probability. Disorder removed for clarity.



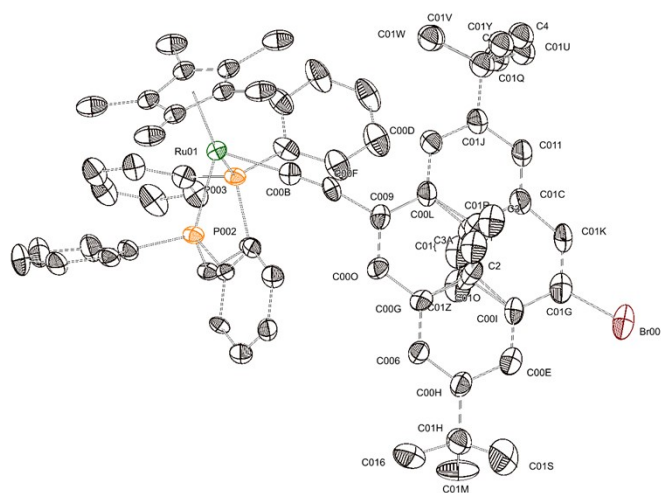

**Figure S44** ORTEP representation of **Ru8**. Hydrogens removed for clarity. Atomic displacement ellipsoids drawn at 30 % probability. Disorder removed for clarity.

**Table S2** Crystal data and structure refinement tables

| Compound                                                                                                       | <b>Ru1</b>                                                                                                                                                                              | <b>Ru2</b>                                                                                                                                                                               | <b>Ru2</b>                                                                                                                                                                               | <b>3c</b>                                                                                                                                                                                |
|----------------------------------------------------------------------------------------------------------------|-----------------------------------------------------------------------------------------------------------------------------------------------------------------------------------------|------------------------------------------------------------------------------------------------------------------------------------------------------------------------------------------|------------------------------------------------------------------------------------------------------------------------------------------------------------------------------------------|------------------------------------------------------------------------------------------------------------------------------------------------------------------------------------------|
| Crystal data                                                                                                   |                                                                                                                                                                                         |                                                                                                                                                                                          |                                                                                                                                                                                          |                                                                                                                                                                                          |
| Chemical formula                                                                                               | C <sub>64</sub> H <sub>70</sub> P <sub>2</sub> Ru                                                                                                                                       | C <sub>69</sub> H <sub>66</sub> P <sub>2</sub> Ru·3(CH <sub>2</sub> Cl <sub>2</sub> )                                                                                                    | C <sub>69</sub> H <sub>66</sub> P <sub>2</sub> Ru                                                                                                                                        | 2(C <sub>18</sub> H <sub>24</sub> Si)                                                                                                                                                    |
| <i>M<sub>r</sub></i>                                                                                           | 1002.21                                                                                                                                                                                 | 1313.00                                                                                                                                                                                  | 1058.22                                                                                                                                                                                  | 536.92                                                                                                                                                                                   |
| Crystal system, space group                                                                                    | Monoclinic, <i>I2/a</i>                                                                                                                                                                 | Monoclinic, <i>P2<sub>1</sub>/c</i>                                                                                                                                                      | Monoclinic, <i>P2<sub>1</sub>/n</i>                                                                                                                                                      | Monoclinic, <i>P2<sub>1</sub>/c</i>                                                                                                                                                      |
| <i>a</i> , <i>b</i> , <i>c</i> (Å)                                                                             | 28.3238 (2), 8.8378 (1), 44.5941 (3)                                                                                                                                                    | 8.9102 (2), 15.2917 (4), 46.4839 (11)                                                                                                                                                    | 11.8379 (2), 15.3879 (2), 29.6079 (5)                                                                                                                                                    | 11.9812 (4), 21.0158 (5), 15.1892 (4)                                                                                                                                                    |
| β (°)                                                                                                          | 99.493 (1)                                                                                                                                                                              | 90.762 (2)                                                                                                                                                                               | 95.826 (1)                                                                                                                                                                               | 112.687 (4)                                                                                                                                                                              |
| <i>V</i> (Å <sup>3</sup> )                                                                                     | 11009.93 (17)                                                                                                                                                                           | 6333.0 (3)                                                                                                                                                                               | 5365.53 (15)                                                                                                                                                                             | 3528.6 (2)                                                                                                                                                                               |
| <i>Z</i>                                                                                                       | 8                                                                                                                                                                                       | 4                                                                                                                                                                                        | 4                                                                                                                                                                                        | 4                                                                                                                                                                                        |
| Radiation type                                                                                                 | Cu <i>K</i> α                                                                                                                                                                           | Mo <i>K</i> α                                                                                                                                                                            | Mo <i>K</i> α                                                                                                                                                                            | Cu <i>K</i> α                                                                                                                                                                            |
| μ (mm <sup>-1</sup> )                                                                                          | 3.13                                                                                                                                                                                    | 0.59                                                                                                                                                                                     | 0.40                                                                                                                                                                                     | 1.04                                                                                                                                                                                     |
| Crystal size (mm)                                                                                              | 0.23 × 0.09 × 0.06                                                                                                                                                                      | 0.23 × 0.21 × 0.10                                                                                                                                                                       | 0.36 × 0.28 × 0.20                                                                                                                                                                       | 0.09 × 0.08 × 0.07                                                                                                                                                                       |
| Data collection                                                                                                |                                                                                                                                                                                         |                                                                                                                                                                                          |                                                                                                                                                                                          |                                                                                                                                                                                          |
| Diffractometer                                                                                                 | XtaLAB Synergy, Single source, HyPix                                                                                                                                                    | Oxford Diffraction Xcalibur, Sapphire3 CCD                                                                                                                                               | Oxford Diffraction Xcalibur, Sapphire3 CCD                                                                                                                                               | XtaLAB Synergy, Single source, HyPix CCD                                                                                                                                                 |
| Absorption correction                                                                                          | Gaussian <i>CrysAlis PRO</i> 1.171.43.70a (Rigaku Oxford Diffraction, 2023) Empirical absorption correction using spherical harmonics, implemented in SCALE3 ABSPACK scaling algorithm. | Multi-scan <i>CrysAlis PRO</i> 1.171.38.46 (Rigaku Oxford Diffraction, 2015) Empirical absorption correction using spherical harmonics, implemented in SCALE3 ABSPACK scaling algorithm. | Multi-scan <i>CrysAlis PRO</i> 1.171.38.46 (Rigaku Oxford Diffraction, 2015) Empirical absorption correction using spherical harmonics, implemented in SCALE3 ABSPACK scaling algorithm. | Gaussian <i>CrysAlis PRO</i> 1.171.41.103a (Rigaku Oxford Diffraction, 2021) Empirical absorption correction using spherical harmonics, implemented in SCALE3 ABSPACK scaling algorithm. |
| <i>T<sub>min</sub></i> , <i>T<sub>max</sub></i>                                                                | 0.621, 1.000                                                                                                                                                                            | 0.959, 1.0                                                                                                                                                                               | 0.849, 1.0                                                                                                                                                                               | 0.310, 1.000                                                                                                                                                                             |
| (sin θ/λ) <sub>max</sub> (Å <sup>-1</sup> )                                                                    | 0.628                                                                                                                                                                                   | 0.741                                                                                                                                                                                    | 0.747                                                                                                                                                                                    | 0.625                                                                                                                                                                                    |
| Refinement                                                                                                     |                                                                                                                                                                                         |                                                                                                                                                                                          |                                                                                                                                                                                          |                                                                                                                                                                                          |
| <i>R</i> [ <i>F</i> <sup>2</sup> > 2σ( <i>F</i> <sup>2</sup> )], <i>wR</i> ( <i>F</i> <sup>2</sup> ), <i>S</i> | 0.035, 0.093, 1.09                                                                                                                                                                      | 0.124, 0.346, 1.01                                                                                                                                                                       | 0.049, 0.130, 1.00                                                                                                                                                                       | 0.124, 0.279, 1.15                                                                                                                                                                       |
| No. of reflections                                                                                             | 11004                                                                                                                                                                                   | 20731                                                                                                                                                                                    | 17844                                                                                                                                                                                    | 6014                                                                                                                                                                                     |
| No. of parameters                                                                                              | 635                                                                                                                                                                                     | 752                                                                                                                                                                                      | 725                                                                                                                                                                                      | 362                                                                                                                                                                                      |
| No. of restraints                                                                                              | 11                                                                                                                                                                                      | 18                                                                                                                                                                                       | 12                                                                                                                                                                                       | 70                                                                                                                                                                                       |
|                                                                                                                | $w = 1/[\sigma^2(F_o^2) + (0.0421P)^2 + 24.8448P]$<br>where $P = (F_o^2 + 2F_c^2)/3$                                                                                                    | $w = 1/[\sigma^2(F_o^2) + (0.140P)^2 + 65.P]$<br>where $P = (F_o^2 + 2F_c^2)/3$                                                                                                          | $w = 1/[\sigma^2(F_o^2) + (0.060P)^2 + 5.P]$<br>where $P = (F_o^2 + 2F_c^2)/3$                                                                                                           | $w = 1/[\sigma^2(F_o^2) + (0.0884P)^2 + 9.9808P]$<br>where $P = (F_o^2 + 2F_c^2)/3$                                                                                                      |
| Δ <sub>max</sub> , Δ <sub>min</sub> (e Å <sup>-3</sup> )                                                       | 0.61, -1.04                                                                                                                                                                             | 2.83, -1.98                                                                                                                                                                              | 2.06, -1.69                                                                                                                                                                              | 0.66, -0.64                                                                                                                                                                              |

Computer programs: CrysAlis PRO system (CCD 41.104a 64-bit (release 16-03-2021)), CrysAlis PRO 1.171.38.46 (Rigaku OD, 2015), CrysAlis PRO 1.171.43.70a (Rigaku OD, 2023), XT (Sheldrick, 2015), SHELXT 2018/2 (Sheldrick, 2018), SHELXT2015/1 (Sheldrick, 2015), XL (Sheldrick, 2008), SHELXL2017/1 (Sheldrick, 2017), Olex2 1.5 (Dolomanov et al., 2009).

**Table S3** Crystal data and structure refinement tables

| Compound                                                                                                       | <b>5</b>                                                                                                                                                                                    | <b>Ru6</b>                                                                                                                                                                                  | <b>Ru8</b>                                                                                                                                                                                  |
|----------------------------------------------------------------------------------------------------------------|---------------------------------------------------------------------------------------------------------------------------------------------------------------------------------------------|---------------------------------------------------------------------------------------------------------------------------------------------------------------------------------------------|---------------------------------------------------------------------------------------------------------------------------------------------------------------------------------------------|
| Crystal data                                                                                                   |                                                                                                                                                                                             |                                                                                                                                                                                             |                                                                                                                                                                                             |
| Chemical formula                                                                                               | C <sub>56</sub> H <sub>62</sub>                                                                                                                                                             | C <sub>75</sub> H <sub>90</sub> P <sub>2</sub> RuSi (CH <sub>2</sub> Cl <sub>2</sub> )                                                                                                      | C <sub>64</sub> H <sub>69</sub> BrP <sub>2</sub> Ru                                                                                                                                         |
| <i>M<sub>r</sub></i>                                                                                           | 735.06                                                                                                                                                                                      | 1267.50                                                                                                                                                                                     | 1081.10                                                                                                                                                                                     |
| Crystal system, space group                                                                                    | Monoclinic, <i>P2<sub>1</sub>/n</i>                                                                                                                                                         | Orthombic, <i>P2<sub>1</sub>2<sub>1</sub>2</i>                                                                                                                                              | Orthombic, <i>Pna2<sub>1</sub></i>                                                                                                                                                          |
| <i>a</i> , <i>b</i> , <i>c</i> (Å)                                                                             | 9.6557 (2), 12.9547 (2), 18.6848 (3)                                                                                                                                                        | 28.0052 (2), 27.3628 (2), 8.7392 (1)                                                                                                                                                        | 31.4242 (14), 19.2612 (9), 8.9346 (7)                                                                                                                                                       |
| β (°)                                                                                                          | 101.938 (1)                                                                                                                                                                                 | 90                                                                                                                                                                                          | 90                                                                                                                                                                                          |
| <i>V</i> (Å <sup>3</sup> )                                                                                     | 2286.67 (7)                                                                                                                                                                                 | 6696.86 (10)                                                                                                                                                                                | 5407.8 (5)                                                                                                                                                                                  |
| <i>Z</i>                                                                                                       | 2                                                                                                                                                                                           | 4                                                                                                                                                                                           | 4                                                                                                                                                                                           |
| Radiation type                                                                                                 | Mo <i>K</i> α                                                                                                                                                                               | Cu <i>K</i> α                                                                                                                                                                               | Cu <i>K</i> α                                                                                                                                                                               |
| μ (mm <sup>-1</sup> )                                                                                          | 0.060                                                                                                                                                                                       | 3.560                                                                                                                                                                                       | 4.058                                                                                                                                                                                       |
| Crystal size (mm)                                                                                              | 0.402 × 0.284 × 0.197                                                                                                                                                                       | 0.09 × 0.06 × 0.05                                                                                                                                                                          | 0.07 × 0.03 × 0.01                                                                                                                                                                          |
| Data collection                                                                                                |                                                                                                                                                                                             |                                                                                                                                                                                             |                                                                                                                                                                                             |
| Diffractometer                                                                                                 | Oxford Diffraction Gemini-R Ultra                                                                                                                                                           | XtaLAB Synergy, Single source, HyPix                                                                                                                                                        | XtaLAB Synergy, Single source, HyPix                                                                                                                                                        |
| Absorption correction                                                                                          | Multi-scan<br><i>CrysAlis PRO</i> 1.171.39.46 (Rigaku Oxford Diffraction, 2015) Empirical absorption correction using spherical harmonics, implemented in SCALE3 ABSPACK scaling algorithm. | Gaussian<br><i>CrysAlis PRO</i> 1.171.41.103a (Rigaku Oxford Diffraction, 2021) Empirical absorption correction using spherical harmonics, implemented in SCALE3 ABSPACK scaling algorithm. | Gaussian<br><i>CrysAlis PRO</i> 1.171.41.103a (Rigaku Oxford Diffraction, 2021) Empirical absorption correction using spherical harmonics, implemented in SCALE3 ABSPACK scaling algorithm. |
| <i>T</i> <sub>min</sub> , <i>T</i> <sub>max</sub>                                                              | 0.980, 0.988                                                                                                                                                                                | 0.774, 0.837                                                                                                                                                                                | 0.803, 0.907                                                                                                                                                                                |
| (sin θ/λ) <sub>max</sub> (Å <sup>-1</sup> )                                                                    | 0.761                                                                                                                                                                                       | 0.628                                                                                                                                                                                       | 0.595                                                                                                                                                                                       |
| Refinement                                                                                                     |                                                                                                                                                                                             |                                                                                                                                                                                             |                                                                                                                                                                                             |
| <i>R</i> [ <i>F</i> <sup>2</sup> > 2σ( <i>F</i> <sup>2</sup> )], <i>wR</i> ( <i>F</i> <sup>2</sup> ), <i>S</i> | 0.0547, 0.1229, 1.002                                                                                                                                                                       | 0.0410, 0.0901, 1.043                                                                                                                                                                       | 0.1110, 0.2049, 1.136                                                                                                                                                                       |
| No. of reflections                                                                                             | 8016                                                                                                                                                                                        | 13538                                                                                                                                                                                       | 8865                                                                                                                                                                                        |
| No. of parameters                                                                                              | 300                                                                                                                                                                                         | 761                                                                                                                                                                                         | 557                                                                                                                                                                                         |
| No. of restraints                                                                                              | 0                                                                                                                                                                                           | 7                                                                                                                                                                                           | 296                                                                                                                                                                                         |
| Δρ <sub>max</sub> , Δρ <sub>min</sub> (e Å <sup>-3</sup> )                                                     | 0.710, -0.169                                                                                                                                                                               | 1.002, -0.855                                                                                                                                                                               | 1.710, -1.681                                                                                                                                                                               |

Computer programs: *CrysAlis PRO* system (CCD 41.104a 64-bit (release 16-03-2021)), *CrysAlis PRO* 1.171.38.46 (Rigaku OD, 2015), *CrysAlis PRO* 1.171.43.70a (Rigaku OD, 2023), *XT* (Sheldrick, 2015), *SHELXT* 2018/2 (Sheldrick, 2018), *SHELXT*2015/1 (Sheldrick, 2015), *XL* (Sheldrick, 2008), *SHELXL*2017/1 (Sheldrick, 2017), *Olex2* 1.5 (Dolomanov et al., 2009).

## Electrochemistry

a

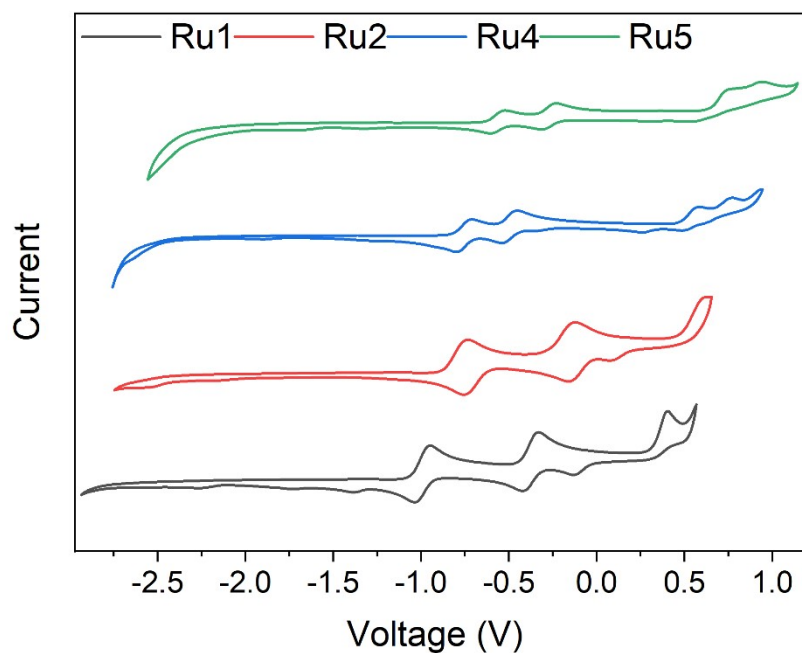

b

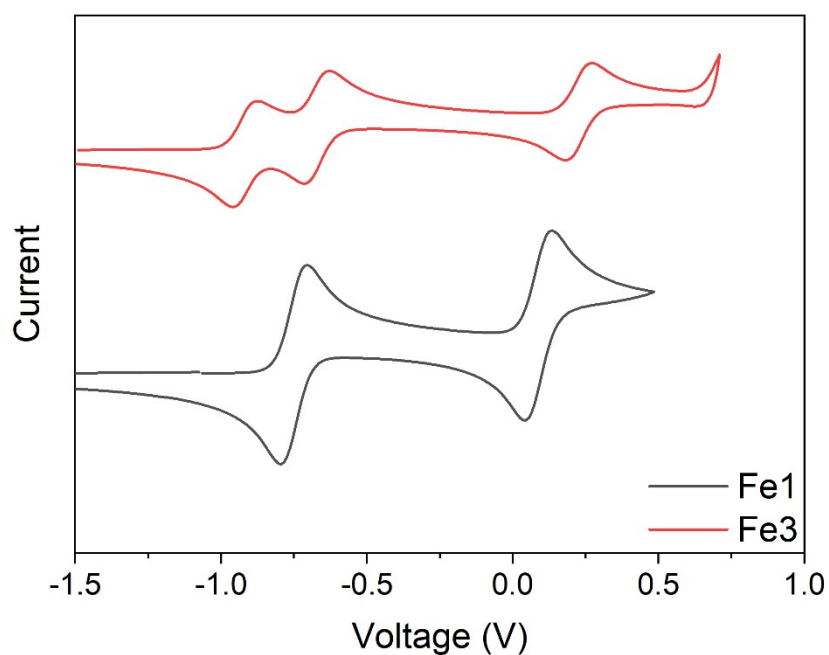

**Figure S43** Collected cyclic voltammograms (IUPAC convention) for **Ru1,2,4,5** (a) and **Fe1,3** (b) complexes. Voltammetry experiments were carried out in a three-electrode cell using a Pt disc working electrode and Pt coated Ti rods as counter and pseudo-reference electrodes in 0.1 M  $\text{Bu}_4\text{NPF}_6 / \text{CH}_2\text{Cl}_2$  solutions at ambient temperature. No correction for IR compensation was employed.

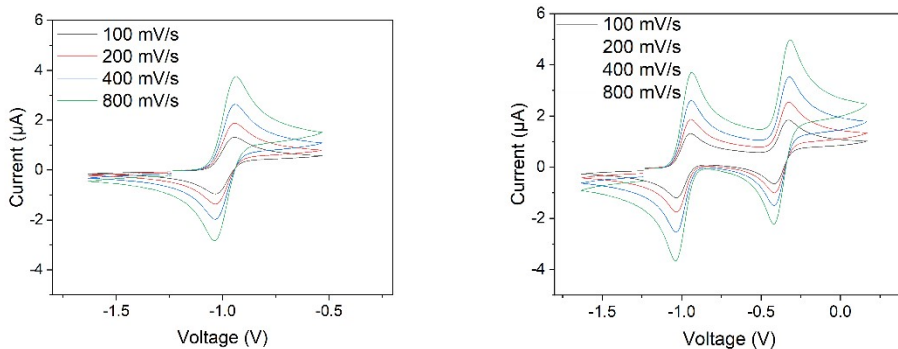

**Figure S44** Cyclic voltammograms (IUPAC convention) for **Ru1**. Voltammetry experiments were carried out in a three-electrode cell using a Pt disc working electrode and Pt coated Ti rods as counter and pseudo-reference electrodes in 0.1 M  $\text{Bu}_4\text{NPF}_6 / \text{CH}_2\text{Cl}_2$  solutions at ambient temperature. No correction for IR compensation was employed.

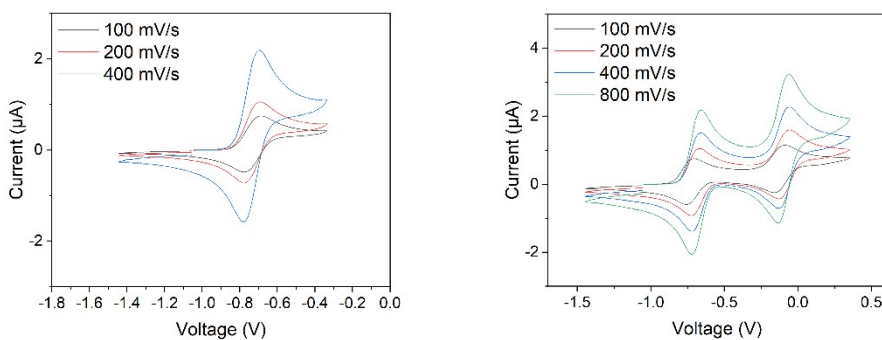

**Figure S45** Cyclic voltammograms (IUPAC convention) for **Ru2**. Voltammetry experiments were carried out in a three-electrode cell using a Pt disc working electrode and Pt coated Ti rods as counter and pseudo-reference electrodes in 0.1 M  $\text{Bu}_4\text{NPF}_6 / \text{CH}_2\text{Cl}_2$  solutions at ambient temperature. No correction for IR compensation was employed.

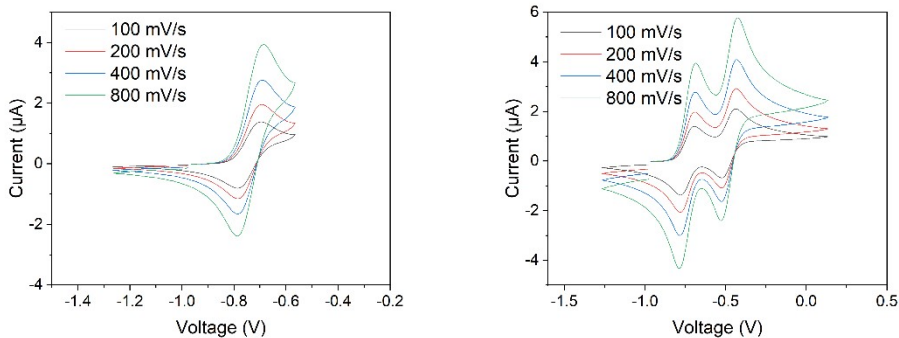

**Figure S46** Cyclic voltammograms (IUPAC convention) for **Ru4**. Voltammetry experiments were carried out in a three-electrode cell using a Pt disc working electrode and Pt coated Ti rods as counter and pseudo-reference electrodes in 0.1 M  $\text{Bu}_4\text{NPF}_6 / \text{CH}_2\text{Cl}_2$  solutions at ambient temperature. No correction for IR compensation was employed.

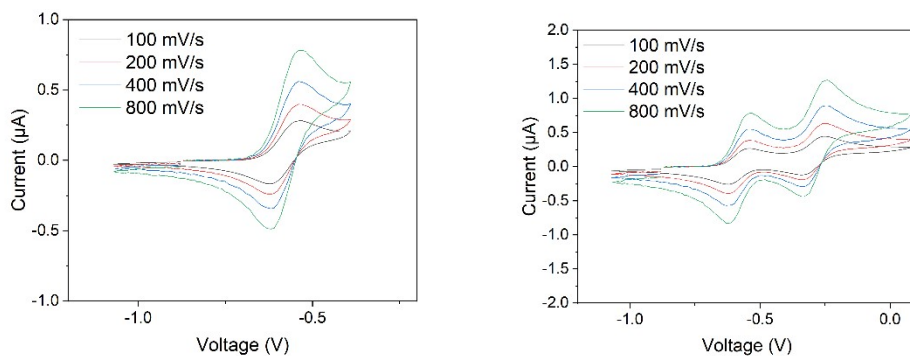

**Figure S47** Cyclic voltammograms (IUPAC convention) for **Ru5**. Voltammetry experiments were carried out in a three-electrode cell using a Pt disc working electrode and Pt coated Ti rods as counter and pseudo-reference electrodes in 0.1 M  $\text{Bu}_4\text{NPF}_6 / \text{CH}_2\text{Cl}_2$  solutions at ambient temperature. No correction for IR compensation was employed.

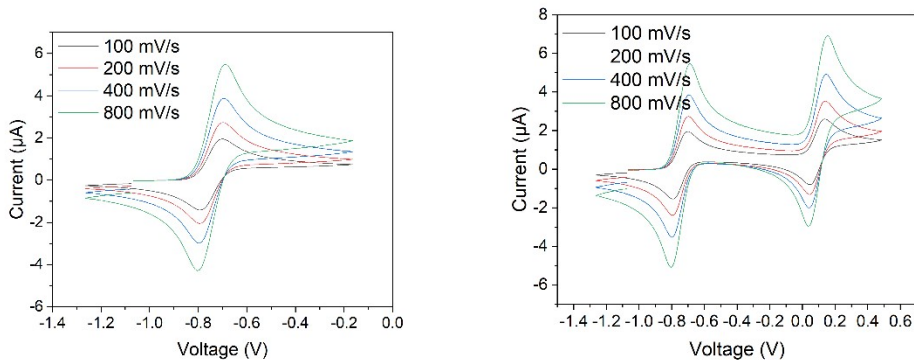

**Figure S48** Cyclic voltammograms (IUPAC convention) for **Fe1**. Voltammetry experiments were carried out in a three-electrode cell using a Pt disc working electrode and Pt coated Ti rods as counter and pseudo-reference electrodes in 0.1 M  $\text{Bu}_4\text{NPF}_6 / \text{CH}_2\text{Cl}_2$  solutions at ambient temperature. No correction for IR compensation was employed.

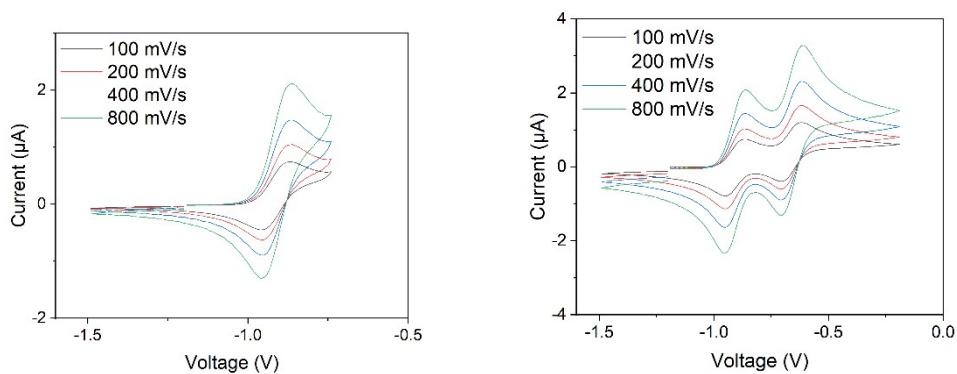

**Figure S49** Cyclic voltammograms (IUPAC convention) for **Fe3**. Voltammetry experiments were carried out in a three-electrode cell using a Pt disc working electrode and Pt coated Ti rods as counter and pseudo-reference electrodes in 0.1 M  $\text{Bu}_4\text{NPF}_6 / \text{CH}_2\text{Cl}_2$  solutions at ambient temperature. No correction for IR compensation was employed.

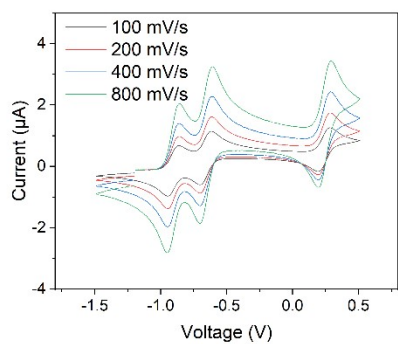

**Figure S50** Cyclic voltammogram (IUPAC convention) for **Fe<sup>3+</sup>**. Voltammetry experiments were carried out in a three-electrode cell using a Pt disc working electrode and Pt coated Ti rods as counter and pseudo-reference electrodes in 0.1 M Bu<sub>4</sub>NPF<sub>6</sub> / CH<sub>2</sub>Cl<sub>2</sub> solutions at ambient temperature. No correction for IR compensation was employed.



## Irradiation Experiments

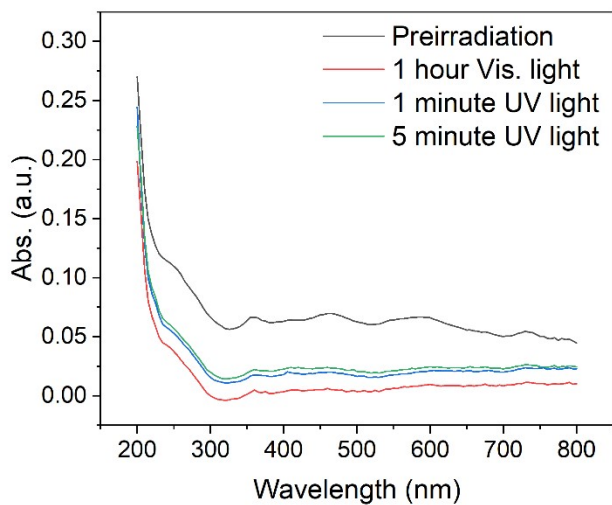

**Figure S51** UV-vis spectra for **Fe<sup>3</sup>** after irradiation with visible and UV light

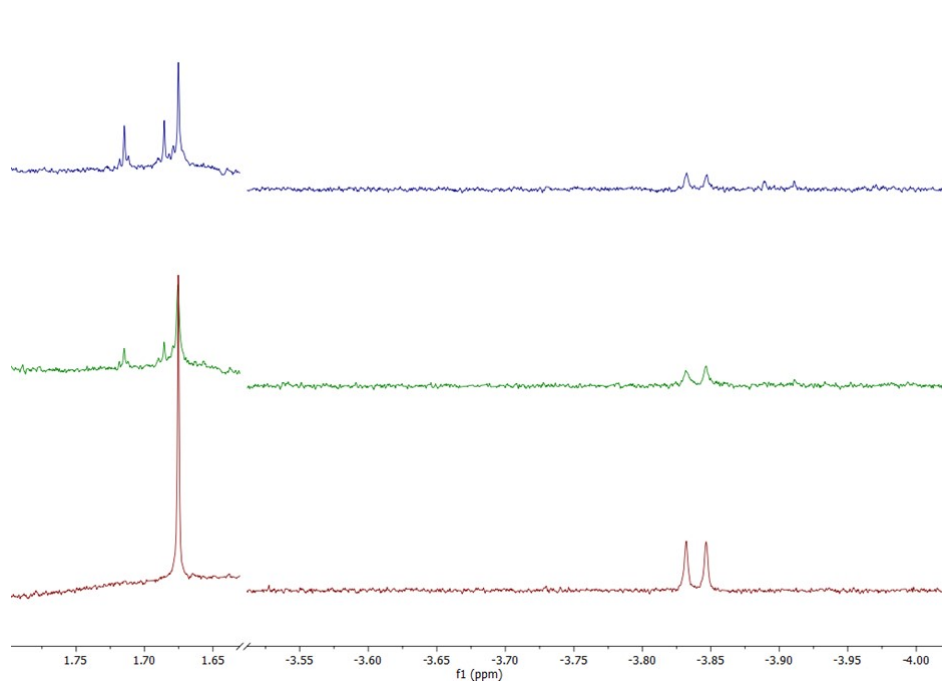

**Figure S52** Changing NMR spectra of **Ru<sup>2</sup>** upon irradiation overnight. Red is pre-irradiation, green is after 3 hours irradiation with visible light and blue is after irradiation overnight (17 h) with visible light.

## Spectroelectrochemistry

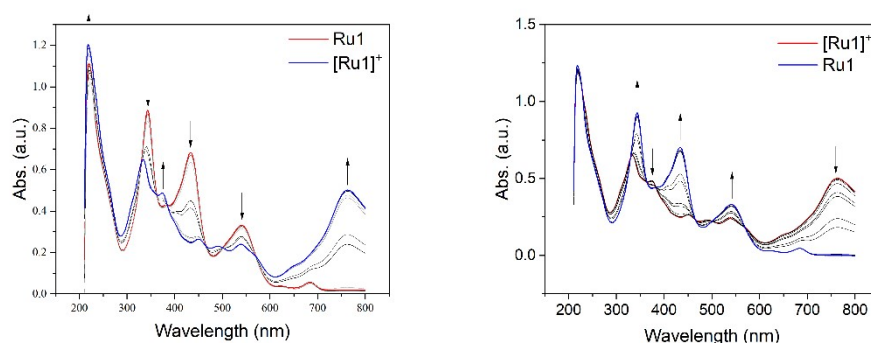

**Figure S53:** Spectroelectrochemically generated UV-Vis-NIR spectra of **Ru1**. First reversible oxidation (left) and reduction (right). Upon sweeping a bias up to 500 mV and returning down to -300 mV where spectra was recorded at every interval.

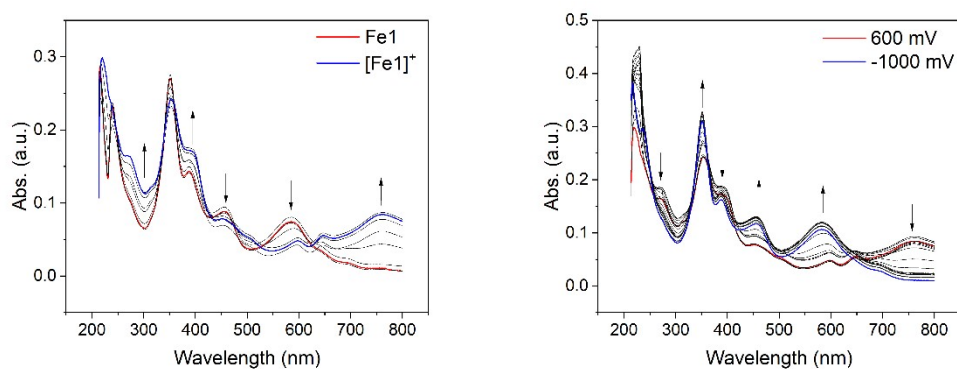

**Figure S54:** Spectroelectrochemically generated UV-Vis-NIR spectra of **Fe1**. First reversible oxidation (left) and reduction (right) events.

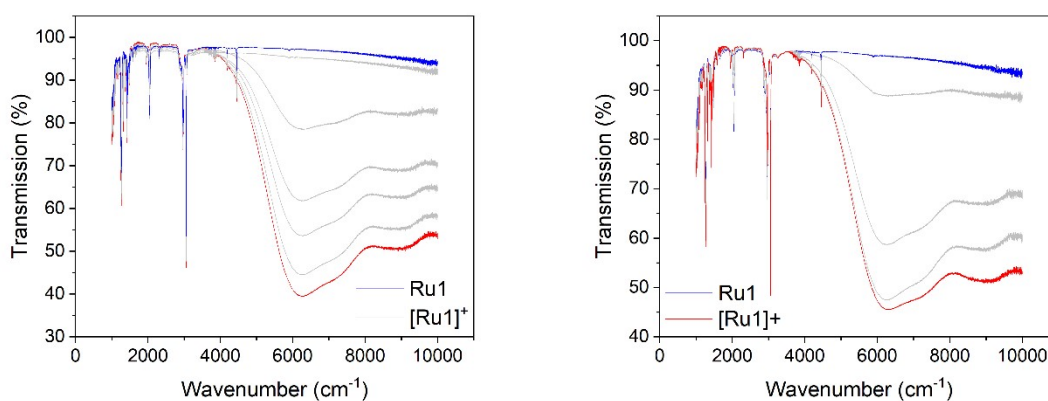

**Figure S55:** Spectroelectrochemically generated IR spectra of **Ru1**. First reversible oxidation (left) and reduction (right).

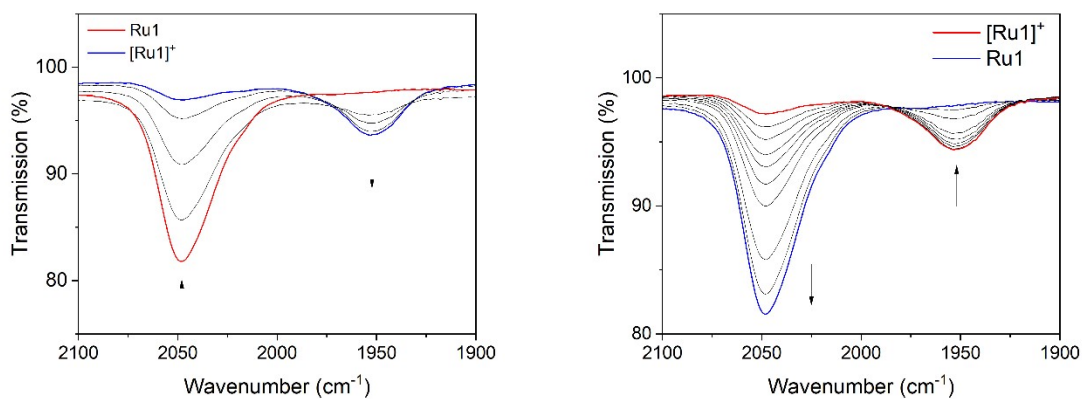

**Figure S56:** Spectroelectrochemically generated IR spectra of **Ru1** focused on the alkynyl stretches of **Ru1** and **[Ru1]<sup>+</sup>**. First reversible oxidation (left) and reduction (right).

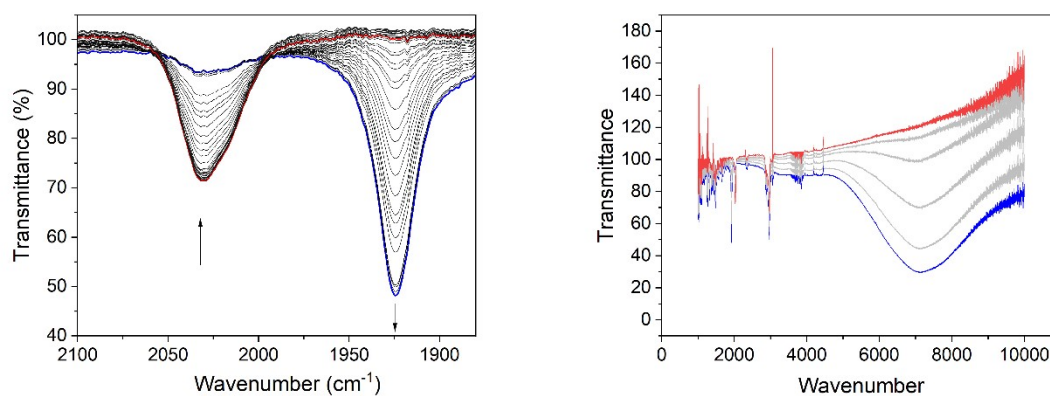

**Figure S57:** Spectroelectrochemically generated IR spectra of **Fe1** to **[Fe1]<sup>+</sup>**. **Fe1** (red) and **[Fe1]<sup>+</sup>** (blue). View of region between 1850 and 2100  $\text{cm}^{-1}$  (left) and expanded between 1000 and 10000  $\text{cm}^{-1}$  (right).

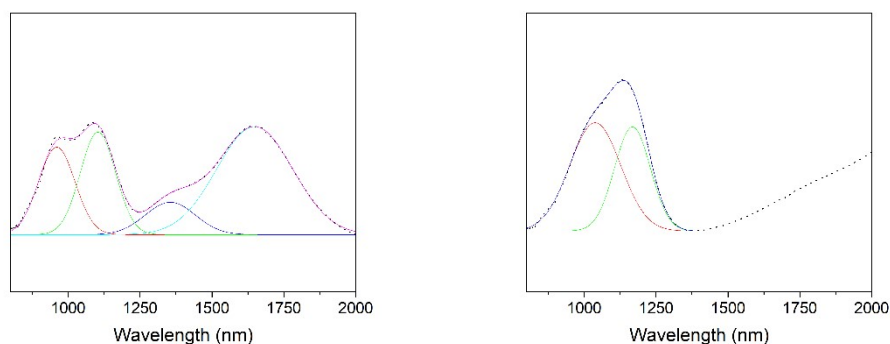

**Figure S58:** Deconvoluted NIR bands for (a) **[Ru4]<sup>+</sup>** and (b) **[Fe3]<sup>+</sup>**.

**Table S4:** Deconvoluted Gaussian peaks for **Ru4** and **Fe2**

| <b>Compound</b> | <b>Peak</b> | <b><math>V_{\max}/\text{nm (cm}^{-1}\text{)}</math></b> | <b>Abs</b> | <b>FWHM /<math>\text{cm}^{-1}</math></b> |
|-----------------|-------------|---------------------------------------------------------|------------|------------------------------------------|
| <b>Ru4</b>      | 1           | 960 (10400)                                             | 0.211      | 1628                                     |
|                 | 2           | 1103 (9066)                                             | 0.243      | 1188                                     |
|                 | 3           | 1355 (7380)                                             | 0.092      | 1117                                     |
|                 | 4           | 1648 (6068)                                             | 0.256      | 1159                                     |
| <b>Fe3</b>      | 1           | 1038 (9634)                                             | 0.325      | 1656                                     |
|                 | 2           | 1168 (8562)                                             | 0.314      | 912                                      |

## Acid Switching Studies

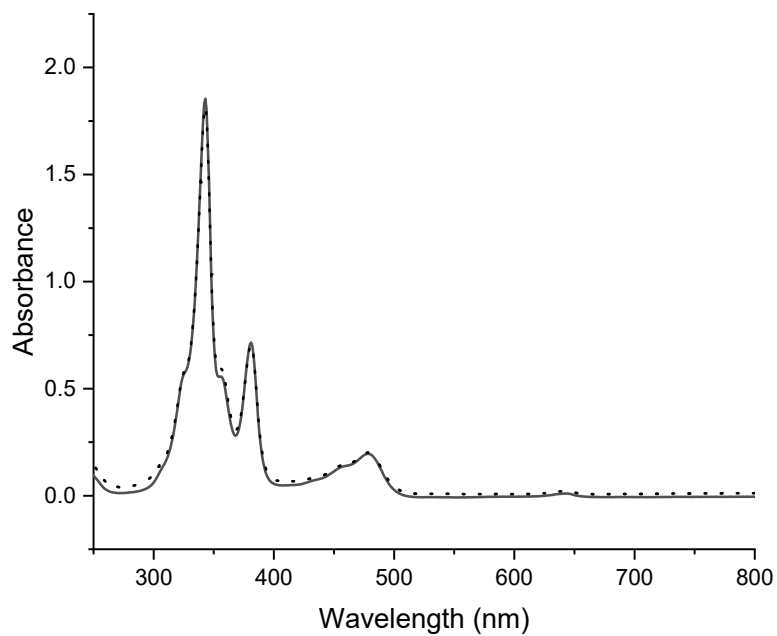

**Figure S59** UV-vis spectra of DHP **1** (solid) and after the addition of excess TFA (dotted)

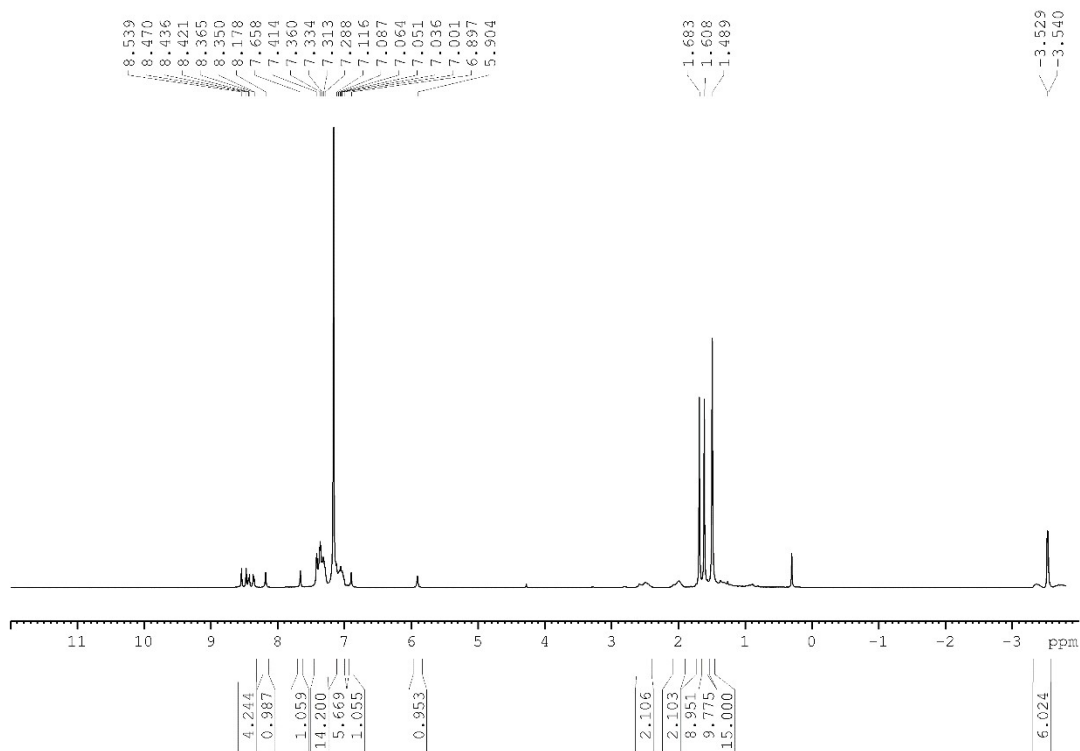

**Figure S60** <sup>1</sup>H NMR spectrum of Ru**1** and an equivalent of TFA

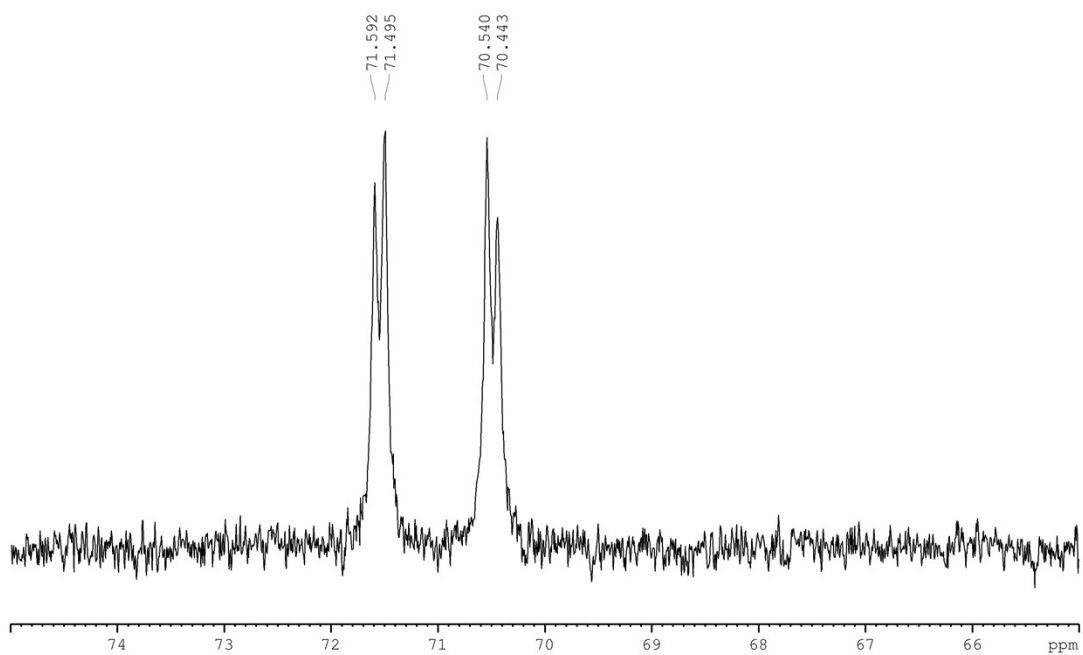

**Figure S61**  $^{31}\text{P}$  NMR spectrum of **Ru1** and an equivalent of TFA

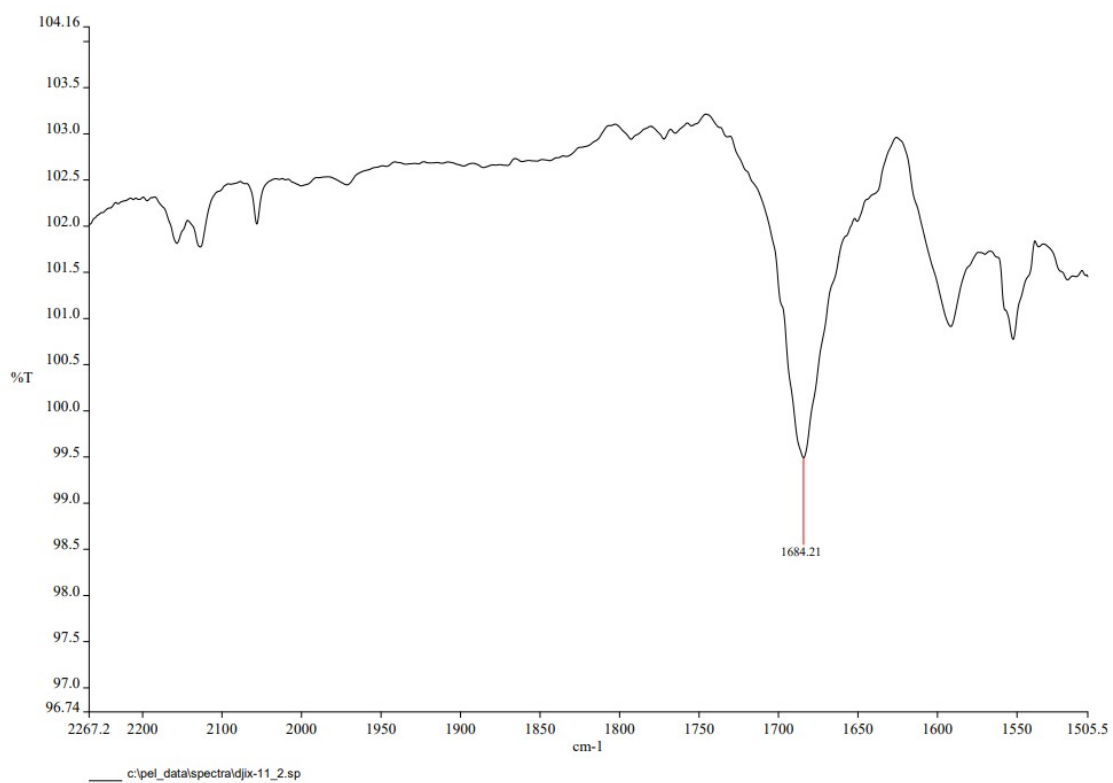

**Figure S62** IR spectrum of **Ru1** and an equivalent of TFA

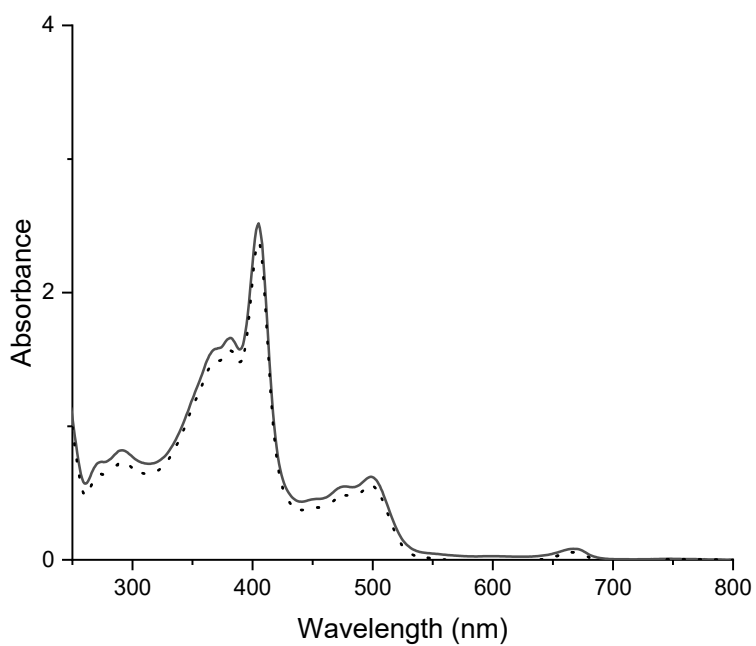

**Figure S63** UV-vis spectrum and **Ru1** and an equivalent of TFA before (solid) and after irradiation with visible light for 90 min (dotted)

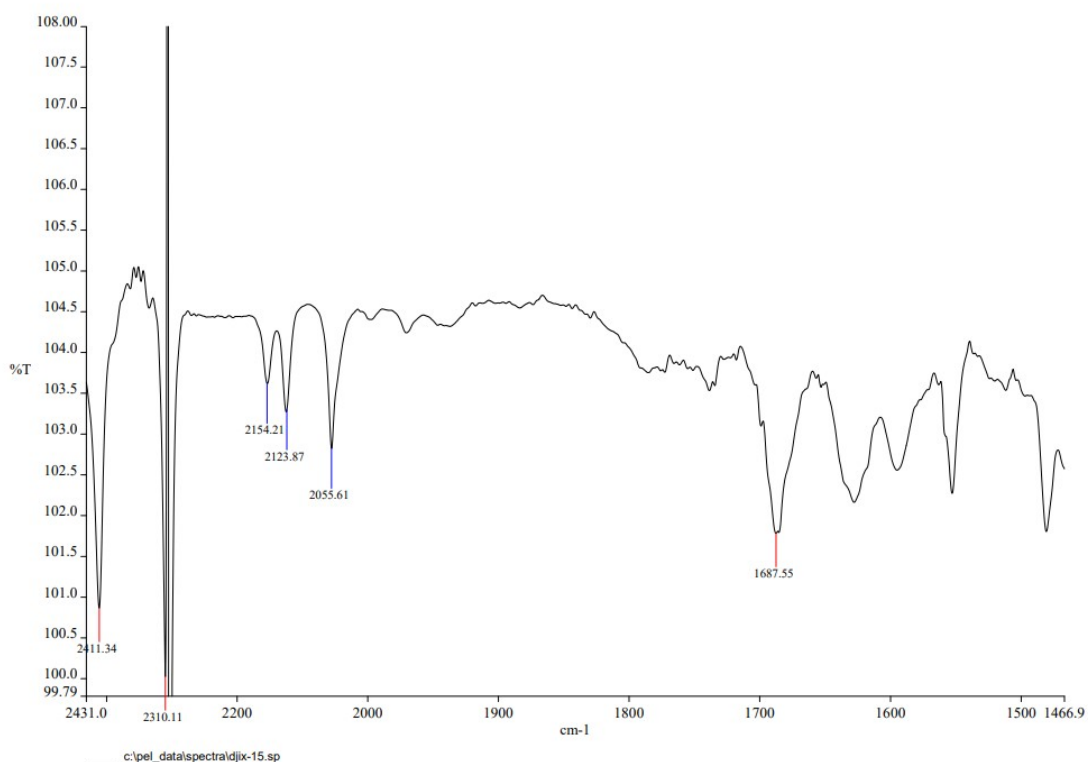

**Figure S64** IR spectrum of **Ru2** and an equivalent of TFA

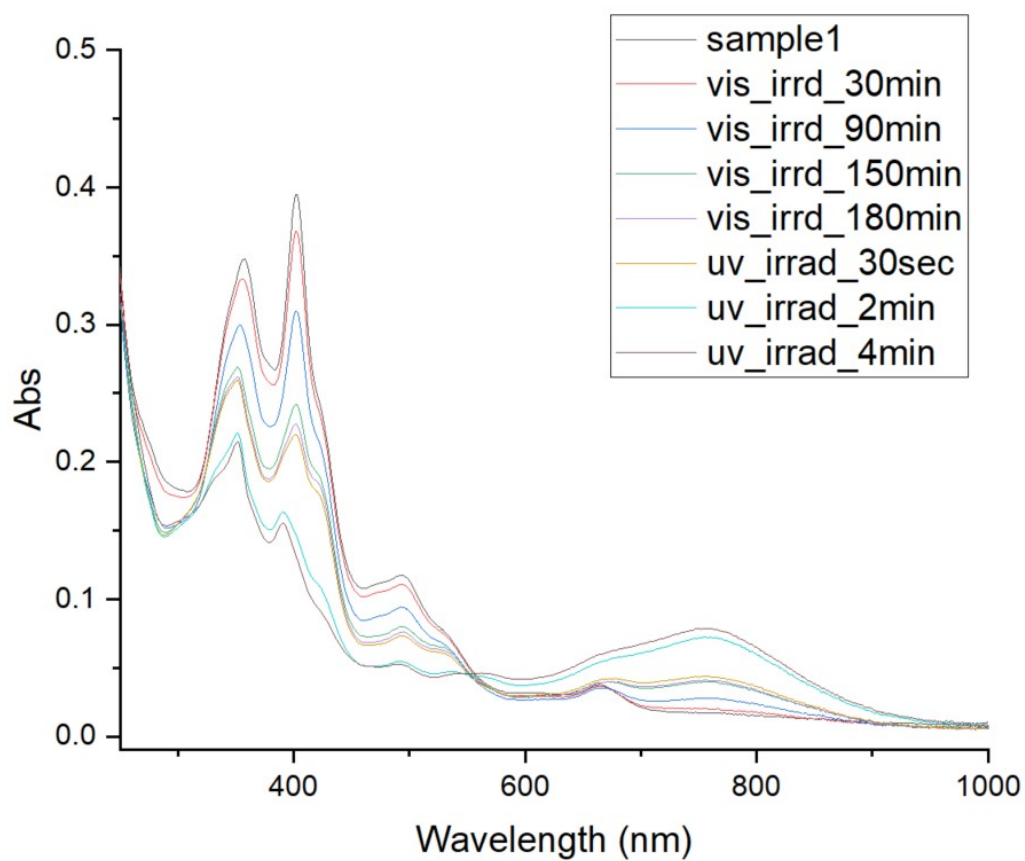

**Figure S65** UV-vis spectrum and **Ru2** and an equivalent of TFA before and after irradiation with visible light and UV light



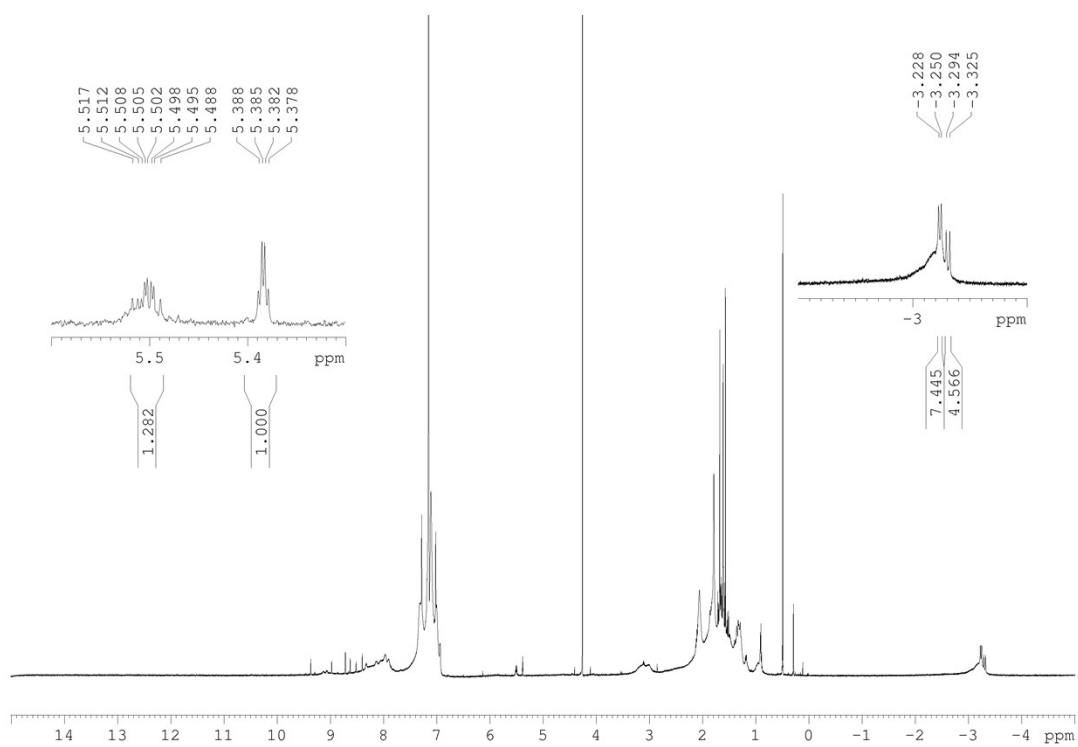

**Figure S66**  $^1\text{H}$  NMR spectrum of **Ru4** and an equivalent of TFA

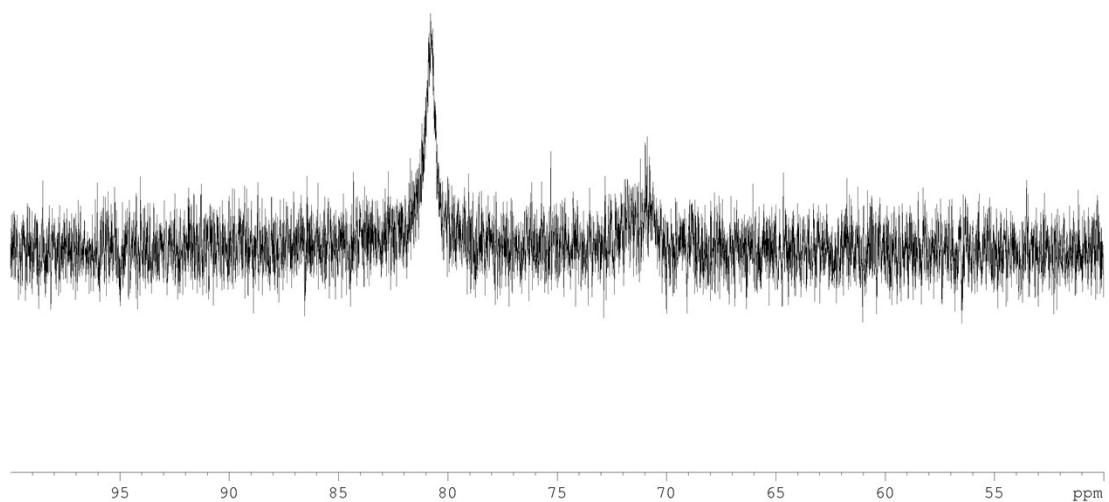

**Figure S67**  $^{31}\text{P}$  NMR spectrum of **Ru4** and an equivalent of TFA

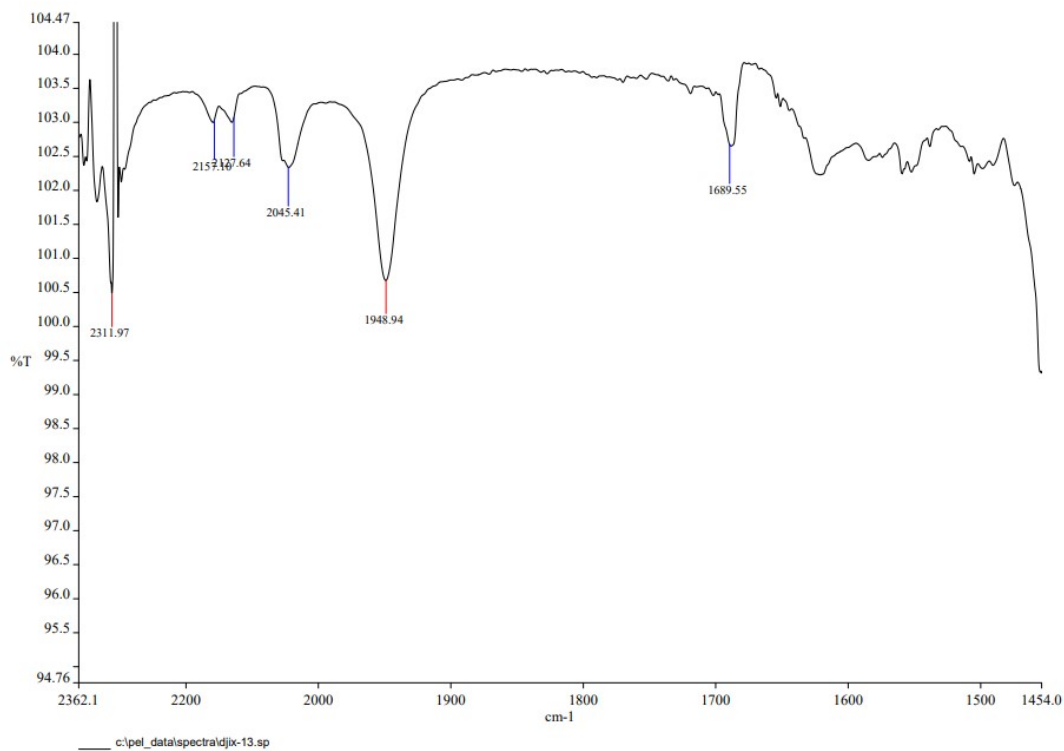

**Figure S68** IR spectrum of **Ru4** and an equivalent of TFA

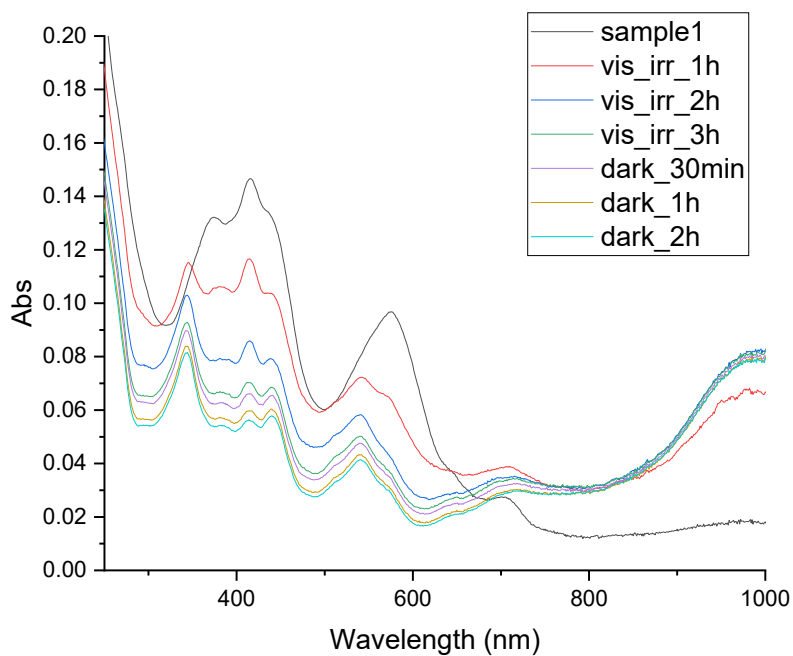

**Figure S69** UV-vis spectrum and **Ru4** and an equivalent of TFA before and after irradiation with visible light and UV light

## Oxidation Switching Studies

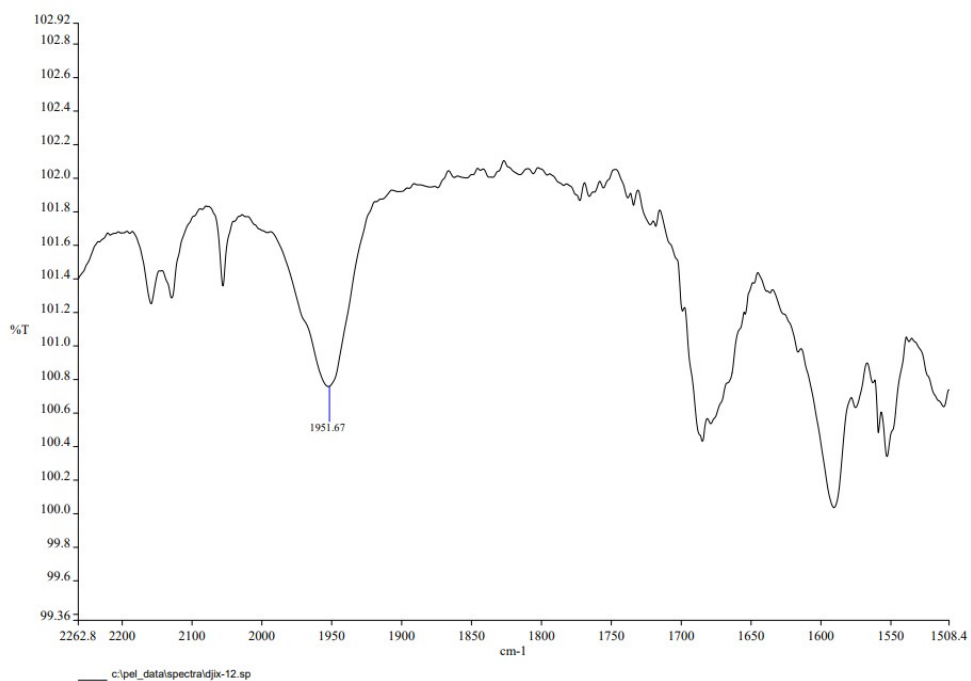

**Figure S70** IR spectrum of **Ru1** and an equivalent of  $\text{Fc}[\text{PF}_6]$

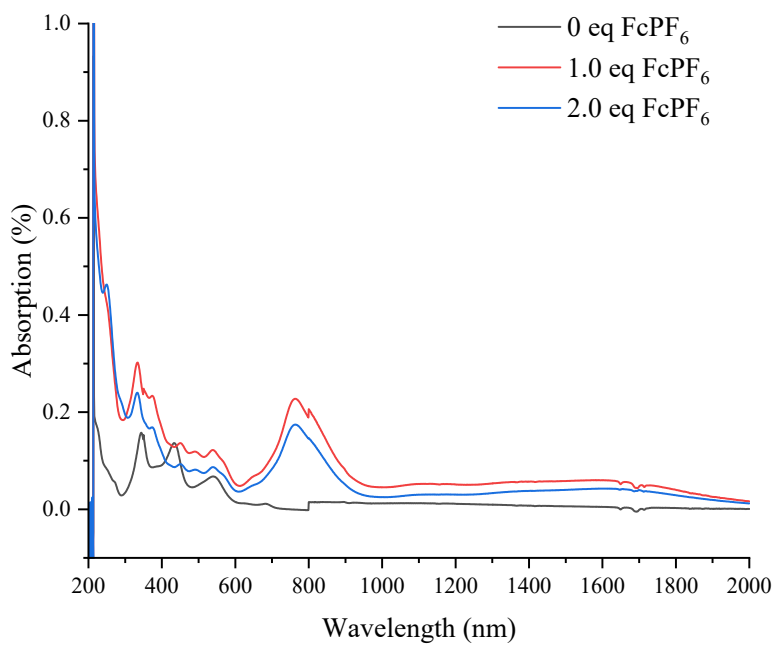

**Figure S71** UV-vis spectra of **Ru1** and 1 to 2 equivalents of  $\text{Fc}[\text{PF}_6]$

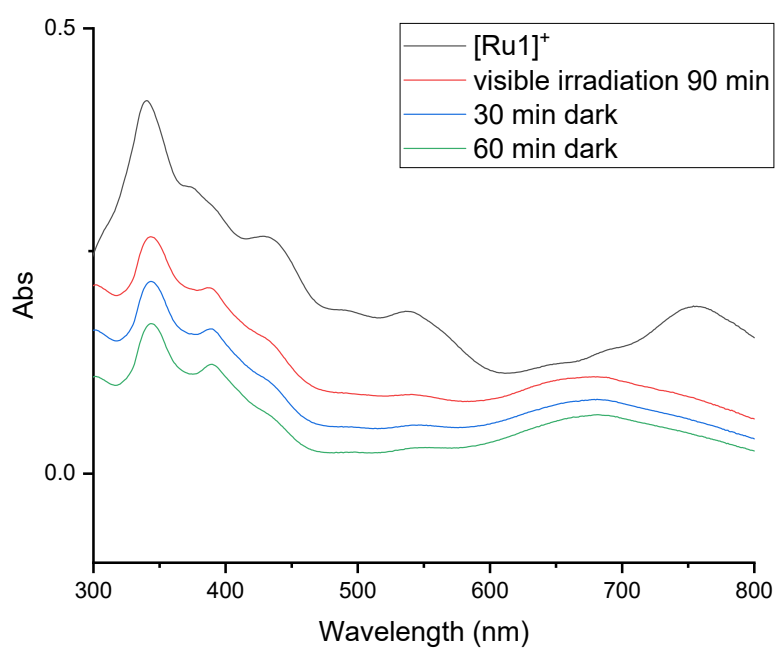

**Figure S72** UV-vis spectra of **Ru1** and an equivalent of Fc[PF<sub>6</sub>] and irradiation with visible light

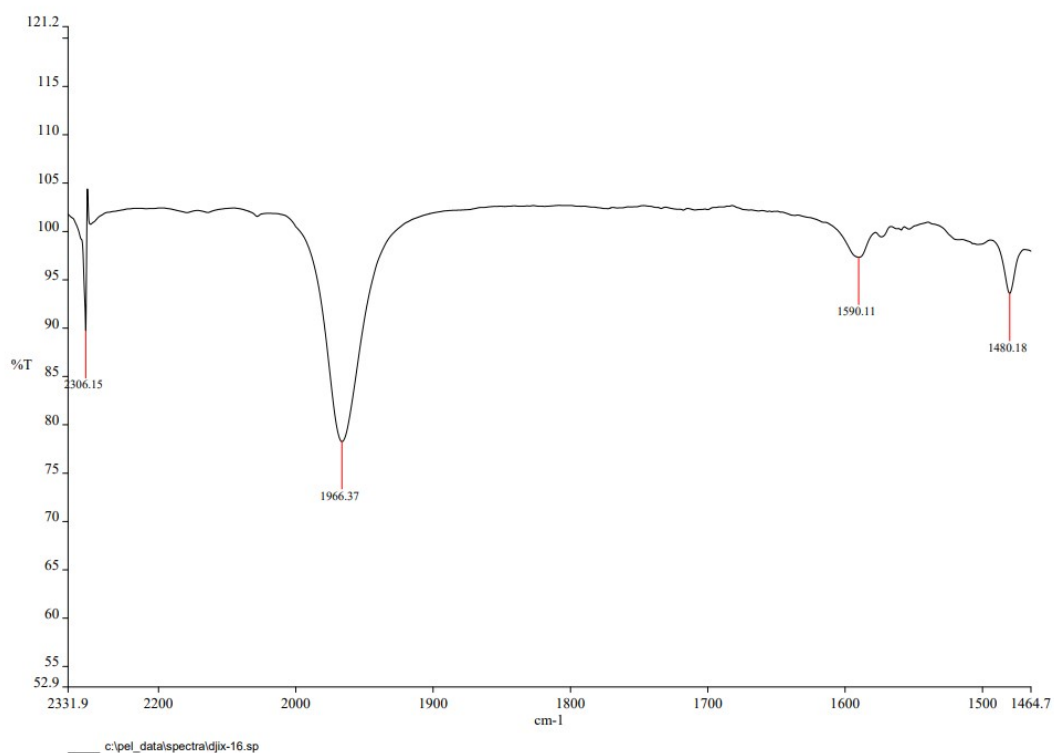

**Figure S73** IR spectrum of **Ru2** and an equivalent of Fc[PF<sub>6</sub>]

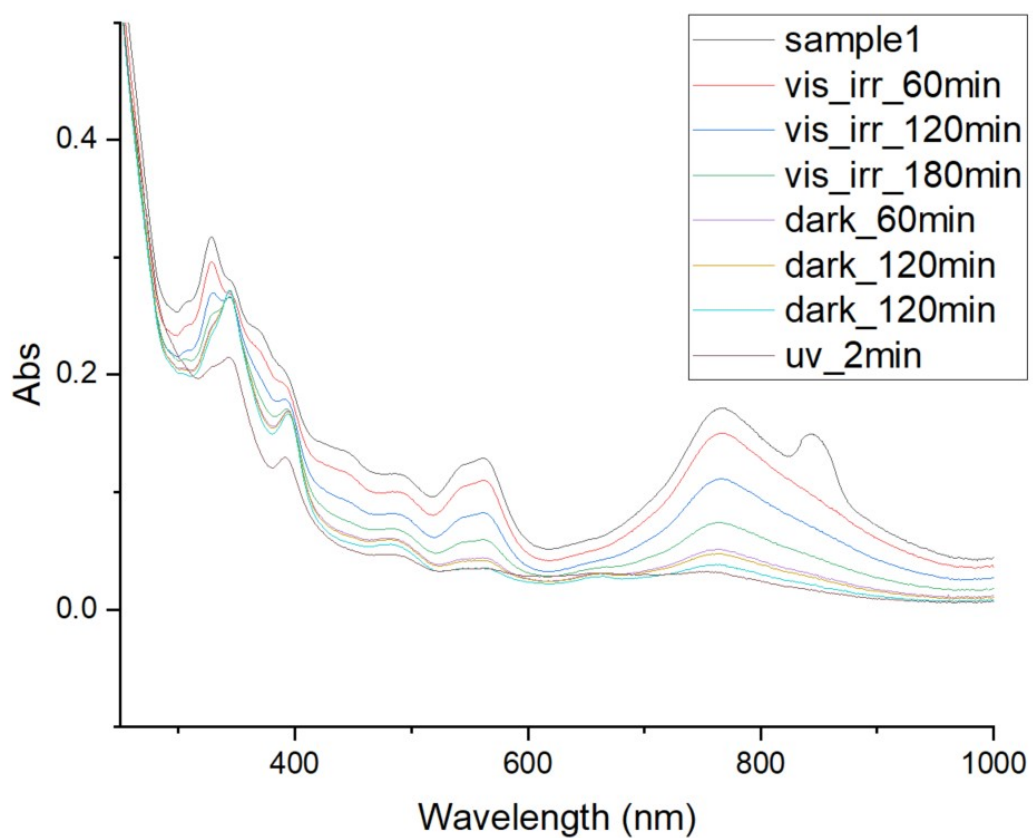

**Figure S74** UV-vis spectra of **Ru2** and an equivalent of  $\text{Fc}[\text{PF}_6]$  plus irradiation with visible and UV light

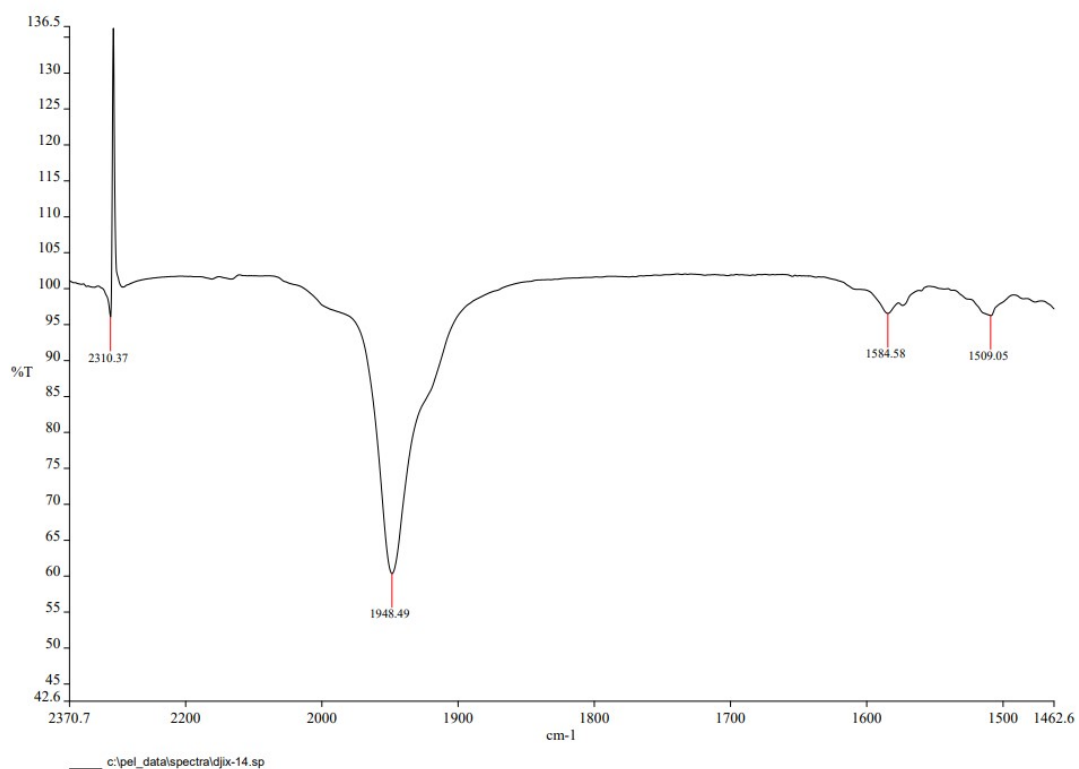

**Figure S75** IR spectrum of **Ru4** and an equivalent of  $\text{Fc}[\text{PF}_6]$

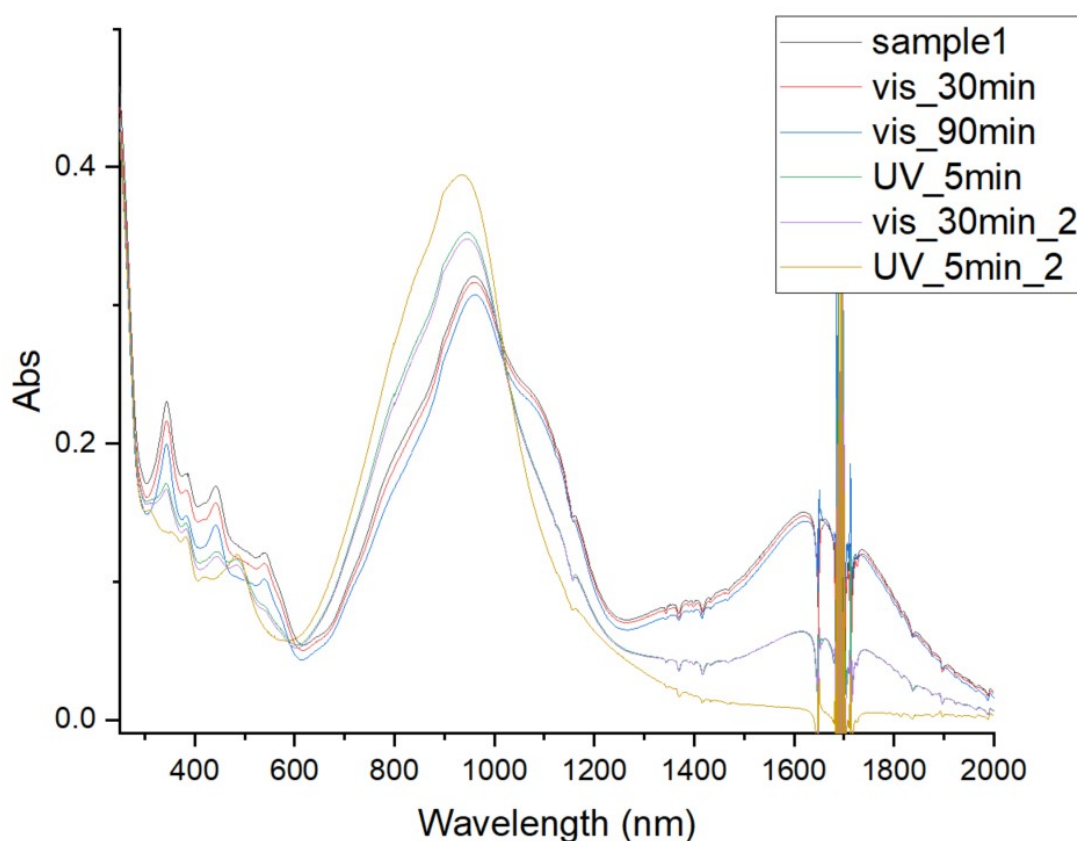

**Figure S76** UV-vis spectra of **Ru4** and an equivalent of  $\text{Fc}[\text{PF}_6]$  and exposure to visible and UV irradiation

### Theoretical

All calculations were performed with the ORCA<sup>4</sup> computational chemistry package, version 5. Initial geometry optimizations for all systems were conducted using the  $\omega\text{B97M-V}^5$  density functional approximation using the def2-SVP<sup>6</sup> basis set, followed by subsequent optimizations with the larger def2-TZVP<sup>6</sup> basis set. This approach was employed in order to balance computational cost with accuracy. The starting point for the ring-closed geometries was extracted from the experimental crystal structures for DHP, **4** and **Ru2**.

In order to rationalise the thermodynamics of the ring-opening mechanism, relaxed potential energy surface scans were performed varying the C-C bond length (of the bond which breaks during the ring-opening event) from its length in the ring-closed state (roughly 1.5 Å) to 3.0 Å over 15 steps. For the DHP-monoalkynyl system **4**, the def2-TZVP basis set was used due for consistency with the other geometry optimisations. However, for the organometallic

**Ru2** system, the def2-SVP basis set was employed due to computational expense, as these are significantly larger systems. The resulting energy profiles from the relaxed surface scans are provided in Figure S78.

Once these scans were complete, the end point of the scan (where the C-C distance is 3.0 Å) was taken as the starting point for the ring-open geometry optimisations, all of which were performed using the larger def2-TZVP basis set. Molecular orbital isosurfaces for the HOMO and LUMO for DHP, monoalkynyl DHP, Ru1 and Ru2 are provided in Figure S79.

For all four systems in their ring-open and ring-closed conformations, Time-Dependent Density Functional Theory (TDDFT) calculations were performed in order to simulate the UV-visible spectra. Here the  $\omega$ B97M -V functional was utilized for the organometallic system (**Ru2**), while the SCS-wB88PP86, a double hybrid functional, was used for the DHP-monoalkynyl system **4** as it was computationally feasible and has demonstrated excellent results for TDDFT calculations.<sup>7</sup> All TDDFT calculations used the def2-TZVP basis set, with the autoaux setting 'nroots=15' (i.e. the number of transitions) and 'maxdim=5' (the Davidson expansion space corresponding to the product of maxdim and numroots). The resulting UV-visible spectra are provided in Figure S80.



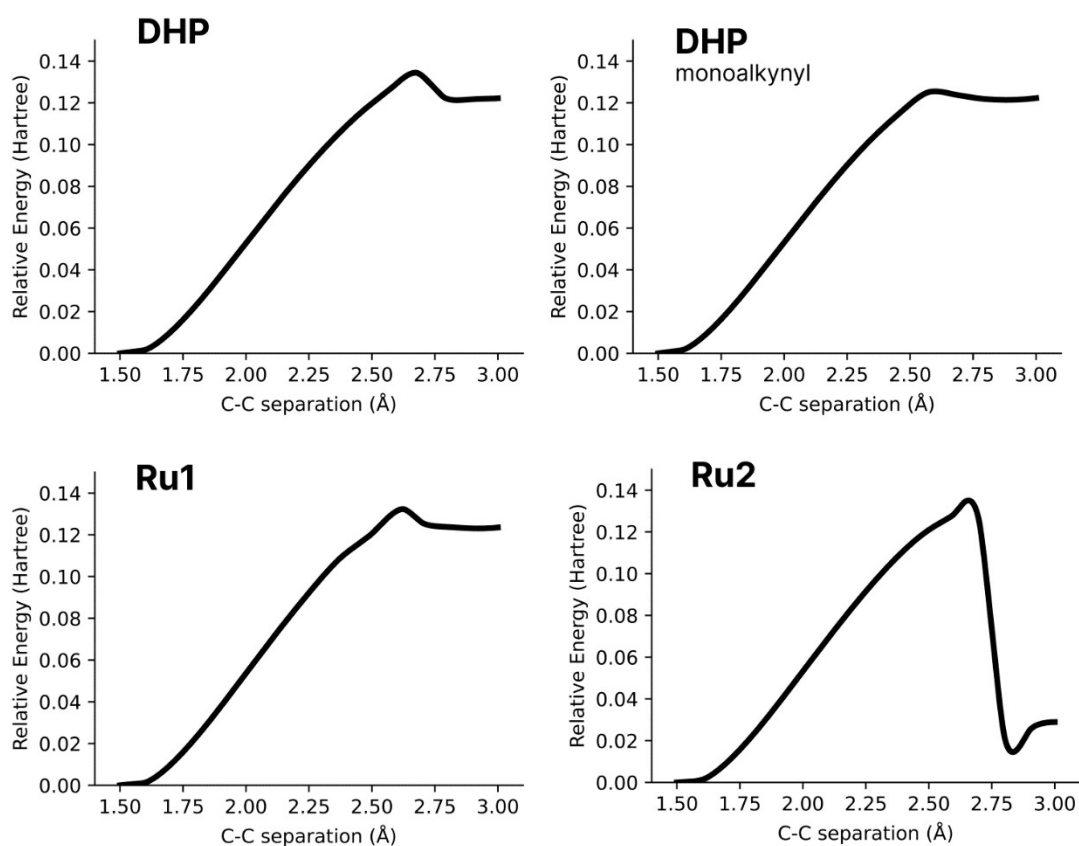

**Figure S77** Relaxed surfaces scans of DHP (top left), monoalkynyl DHP (top right), **Ru1** (bottom left) and **Ru2** (bottom right). These plots show the relative energy (y-axis) against the ring-opening C-C distance (x-axis), which has been evaluated by fixing the C-C distance to 15 values over the range of 1.5 - 3.0 angstroms at 15 separate points, then plotted as a continuous line in order to indicate the overall trend/behaviour.

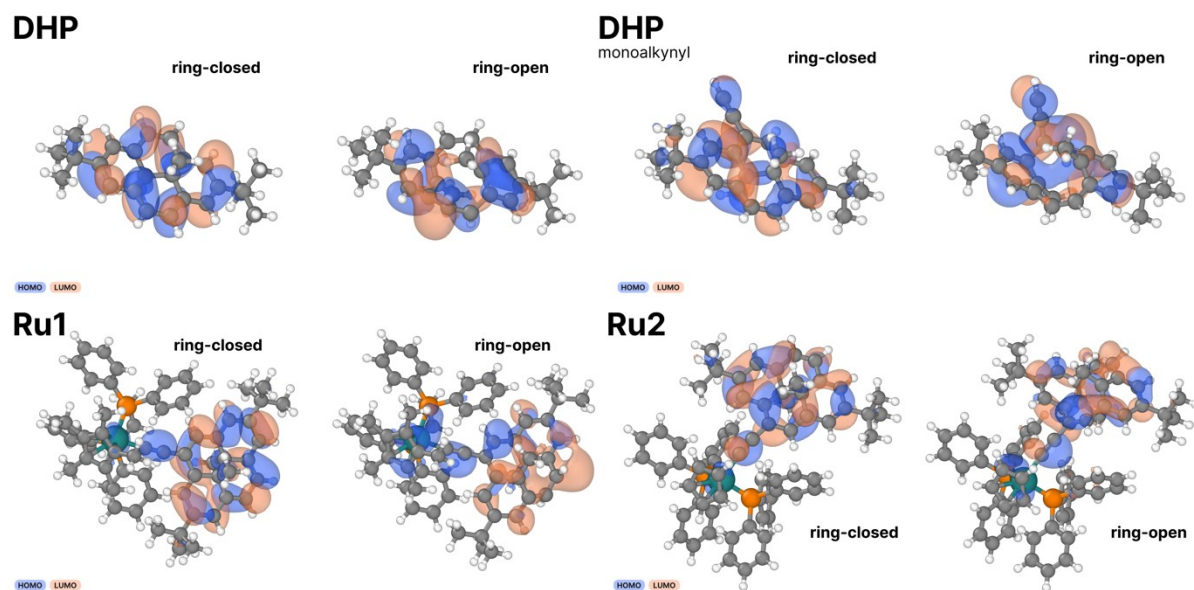

**Figure S78** Molecular orbital isosurfaces (0.02au) of the HOMO (blue) and LUMO (orange) for the ring-open and ring-closed forms of DHP (top left), monoalkynyl DHP (top right), Ru1 (bottom left) and Ru2 (bottom right).

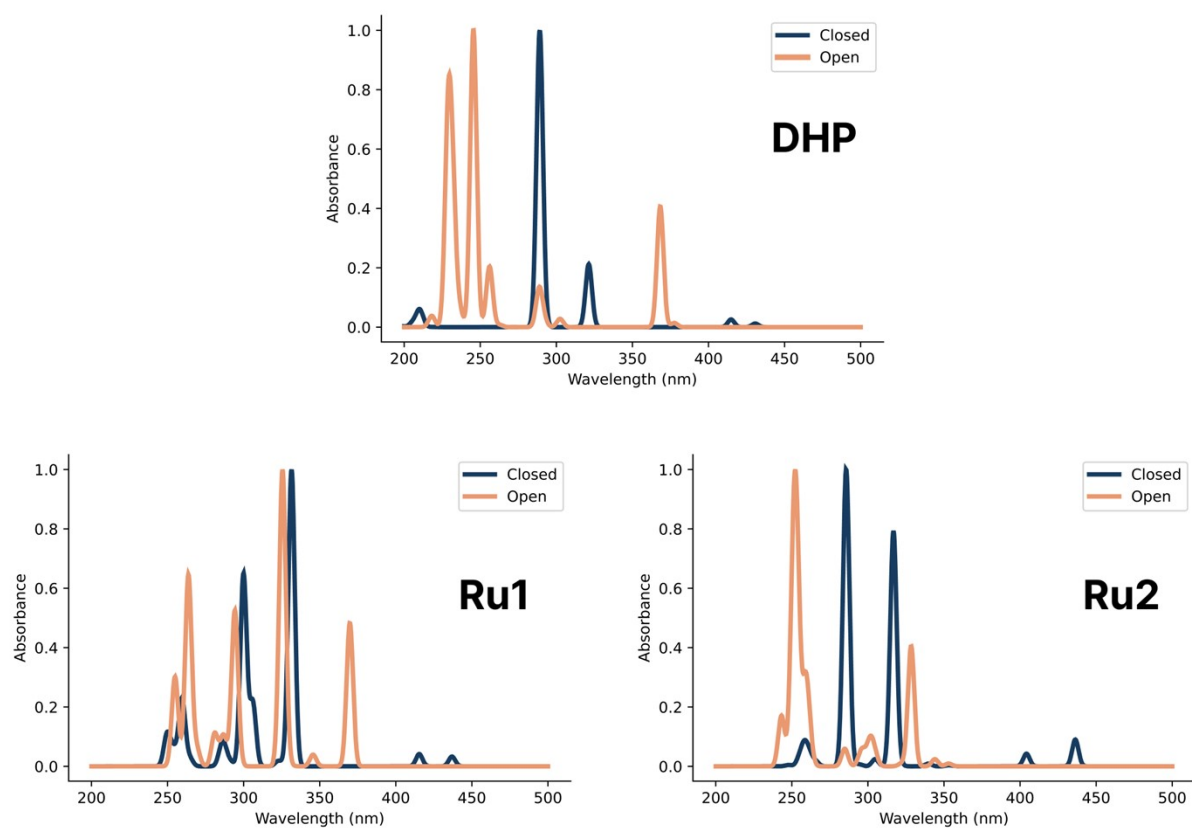

**Figure S79** Computed UV-visible spectra for the ring-open and ring-closed forms of DHP (top), Ru1 (bottom left) and Ru2 (bottom right).

## References

1. G. Sheldrick, *Acta Crystallogr. A*, 2015, **71**, 3-8.
2. O. V. Dolomanov, L. J. Bourhis, R. J. Gildea, J. A. K. Howard and H. Puschmann, *J. Appl. Crystallogr.*, 2009, **42**, 339-341.
3. G. Sheldrick, *Acta. Crystallogr. C*, 2015, **71**, 3-8.
4. F. Neese, *Wiley Interdiscip. Rev. Comput. Mol. Sci.*, 2022, **12**, e1606.
5. N. Mardirossian and M. Head-Gordon, *J. Chem. Phys.*, 2016, **144**, 214110.
6. F. Weigend and R. Ahlrichs, *Phys. Chem. Chem. Phys.*, 2005, **7**, 3297-3305.
7. M. Casanova-Paez and L. Goerigk, *J Chem Theory Comput*, 2021, **17**, 5165-5186.
